# Supplementary material for: Defining and navigating macrocycle chemical space
Source: Chem Sci. 2021 Mar 4;12(12):4309–28. doi: 10.1039/d0sc05788f (PMC8179434; doi:10.1039/d0sc05788f)
Supplement: SC-012-D0SC05788F-s002 [file SC-012-D0SC05788F-s002.xlsx]

## Sheet: Oral Drugs Scores & SMILES
	scores					Molecular Descriptor Values
Oral MC Drugs and CC	PC1 (x)	PC2 (y)	PC3 (z)	Zone	SMILES	001_MW	002_HBD	003_HBD/HA	004_HBA	005_HBA/HA	006_CLogP	007_Nrb	008_PSA	009_Largest Ring Size (N)	010_Large Subs	011_Small Subs	012_SubHA/HA	013_SubCount/N	014_PeriphCount/N	015_(SubN+1)/(SubO+1)	016_(PeriphN+1)/(PeriphO+1)	017_(TotalN+1)/(TotalO+1)	018_ChiralCenters/HA	019_RingChiralCenters/N	020_N/HA	021_(SubHA+PeriphHA)/HA	022_RingHet/N	023_TotalHet/HA	024_RingOxygen/N	025_TotalOxygen/HA	026_RingNitrogen/N	027_TotalNitrogen/HA	028_PeriphFluorine/N	029_TotalFluorine/HA	030_PeriphChlorine/N	031_TotalChlorine/HA	032_RingSulfur/N	033_TotalSulfur/HA	034_TotalAromatics/HA	035_Spiro Rings	036_FusedRings/N	037_Bridges	038_SubN/SubHA	039_SubO/SubHA	040_SubF/SubHA	041_SubCl/SubHA	042_SubS/SubHA	043_SubHeteroatoms/SubHA	044_(RingN+1)/(RingO+1)
AMG-176	14.2695	21.4816	-50.3616	1	CO[C@H]1\C=C\C[C@H](C)[C@@H](C)S(=O)(=O)NC(=O)C2=CC=C3OC[C@]4(CCCC5=CC(Cl)=CC=C45)CN(C[C@@H]4CC[C@@H]14)C3=C2	612.242	1	0.0238095	6	0.142857	5.95379	1	82.14	16	1	2	0.5	0.1875	0.3125	0.333333	0.25	0.5	0.142857	0.3125	0.380952	0.619048	0.1875	0.214286	0	0.119048	0.125	0.047619	0	0	0	0.0238095	0.0625	0.0238095	0.285714	0	0.125	1	0	0.0952381	0	0.047619	0	0.142857	3
Azithromycin	13.2155	-110.044	-57.3433	1	CC[C@H]1OC(=O)[C@H](C)[C@@H](O[C@H]2C[C@@](C)(OC)[C@@H](O)[C@H](C)O2)[C@H](C)[C@@H](O[C@@H]2O[C@H](C)C[C@@H]([C@H]2O)N(C)C)[C@](C)(O)C[C@@H](C)CN(C)[C@H](C)[C@@H](O)[C@]1(C)O	748.509	5	0.0961538	13	0.25	2.44478	7	182.48	15	2	1	0.5	0.2	0.733333	0.25	0.2	0.230769	0.346154	0.666667	0.288462	0.711538	0.133333	0.269231	0.0666667	0.230769	0.0666667	0.0384615	0	0	0	0	0	0	0	0	0	0	0.0384615	0.269231	0	0	0	0.307692	1
Clarithromycin	26.044	-105.191	-71.063	1	CC[C@H]1OC(=O)[C@H](C)[C@@H](O[C@H]2C[C@@](C)(OC)[C@@H](O)[C@H](C)O2)[C@H](C)[C@@H](O[C@@H]2O[C@H](C)C[C@@H]([C@H]2O)N(C)C)[C@@](C)(C[C@@H](C)C(=O)[C@H](C)[C@@H](O)[C@]1(C)O)OC	747.477	4	0.0769231	13	0.25	3.23952	8	184.11	14	2	2	0.538462	0.285714	0.714286	0.222222	0.2	0.142857	0.346154	0.714286	0.269231	0.730769	0.0714286	0.269231	0.0714286	0.25	0	0.0192308	0	0	0	0	0	0	0	0	0	0	0.0357143	0.285714	0	0	0	0.321429	0.5
Cyclosporine	116.167	-49.9479	15.4147	3	CC[C@@H]1NC(=O)[C@H]([C@H](O)[C@H](C)C\C=C\C)N(C)C(=O)[C@H](C(C)C)N(C)C(=O)[C@H](CC(C)C)N(C)C(=O)[C@H](CC(C)C)N(C)C(=O)[C@@H](C)NC(=O)[C@H](C)NC(=O)[C@H](CC(C)C)N(C)C(=O)[C@@H](NC(=O)[C@H](CC(C)C)N(C)C(=O)CN(C)C1=O)C(C)C	1201.84	5	0.0588235	12	0.141176	3.63816	15	278.8	33	1	7	0.376471	0.242424	0.606061	0.5	0.0833333	0.923077	0.141176	0.30303	0.388235	0.611765	0.333333	0.270588	0	0.141176	0.333333	0.129412	0	0	0	0	0	0	0	0	0	0	0	0.03125	0	0	0	0.03125	12
Danoprevir	20.7088	-12.5346	-5.45385	1	CC(C)(C)OC(=O)N[C@H]1CCCCC\C=C/[C@@H]2C[C@]2(NC(=O)[C@@H]2C[C@H](CN2C1=O)OC(=O)N1Cc2cccc(F)c2C1)C(=O)NS(=O)(=O)C1CC1	731.3	3	0.0588235	7	0.137255	2.55037	7	177.72	15	3	0	0.647059	0.2	0.2	0.5	0.333333	0.6	0.0980392	0.266667	0.294118	0.705882	0.133333	0.313725	0	0.176471	0.133333	0.0980392	0	0.0196078	0	0	0	0.0196078	0.117647	0	0.133333	0	0.0909091	0.212121	0.030303	0	0.030303	0.363636	3
Dirithromycin	38.005	-107.347	-82.7139	1	CC[C@H]1OC(=O)[C@H](C)[C@@H](O[C@H]2C[C@@](C)(OC)[C@@H](O)[C@H](C)O2)[C@H](C)[C@@H](O[C@@H]2O[C@H](C)C[C@@H]([C@H]2O)N(C)C)[C@](C)(O)C[C@@H](C)[C@@H]2N[C@@H](COCCOC)O[C@H]([C@H]2C)[C@]1(C)O	834.545	5	0.0862069	15	0.258621	2.94774	12	202.11	14	3	1	0.603448	0.285714	0.642857	0.272727	0.25	0.2	0.344828	0.785714	0.241379	0.758621	0.0714286	0.275862	0.0714286	0.241379	0	0.0344828	0	0	0	0	0	0	0	0	0.0714286	1	0.0571429	0.285714	0	0	0	0.342857	0.5
Erythromycin	23.8928	-110.399	-54.1349	1	CC[C@H]1OC(=O)[C@H](C)[C@@H](O[C@H]2C[C@@](C)(OC)[C@@H](O)[C@H](C)O2)[C@H](C)[C@@H](O[C@@H]2O[C@H](C)C[C@@H]([C@H]2O)N(C)C)[C@](C)(O)C[C@@H](C)C(=O)[C@H](C)[C@@H](O)[C@]1(C)O	733.461	5	0.0980392	13	0.254902	2.59639	7	195.11	14	2	1	0.509804	0.214286	0.785714	0.25	0.166667	0.142857	0.352941	0.714286	0.27451	0.72549	0.0714286	0.27451	0.0714286	0.254902	0	0.0196078	0	0	0	0	0	0	0	0	0	0	0.0384615	0.269231	0	0	0	0.307692	0.5
Erythromycin ethyl succinate	28.4049	-113.935	-53.4817	1	CCOC(=O)CCC(=O)O[C@H]1[C@H](O[C@@H]2[C@@H](C)[C@H](O[C@H]3C[C@@](C)(OC)[C@@H](O)[C@H](C)O3)[C@@H](C)C(=O)O[C@H](CC)[C@@](C)(O)[C@H](O)[C@@H](C)C(=O)[C@H](C)C[C@@]2(C)O)O[C@H](C)C[C@@H]1N(C)C	861.509	4	0.0666667	14	0.233333	3.36508	14	227.48	14	2	1	0.583333	0.214286	0.785714	0.181818	0.166667	0.117647	0.3	0.714286	0.233333	0.766667	0.0714286	0.283333	0.0714286	0.266667	0	0.0166667	0	0	0	0	0	0	0	0	0	0	0.0285714	0.285714	0	0	0	0.314286	0.5
Everolimus	48.9248	-60.0696	-55.1521	1	CO[C@@H]1C[C@H](C[C@@H](C)[C@@H]2CC(=O)[C@H](C)\C=C(C)\[C@@H](O)[C@@H](OC)C(=O)[C@H](C)C[C@H](C)\C=C\C=C\C=C(C)\[C@H](C[C@@H]3CC[C@@H](C)[C@@](O)(O3)C(=O)C(=O)N3CCCC[C@H]3C(=O)O2)OC)CC[C@H]1OCCO	957.581	3	0.0441176	13	0.191176	7.40386	9	204.66	29	1	4	0.397059	0.172414	0.413793	0.166667	0.125	0.133333	0.220588	0.344828	0.426471	0.573529	0.103448	0.220588	0.0689655	0.205882	0.0344828	0.0147059	0	0	0	0	0	0	0	0	0.0689655	1	0	0.185185	0	0	0	0.185185	0.666667
Flopristin	13.71	-7.02497	-19.591	1	CC(C)C1OC(=O)C2CCCN2C(=O)c2coc(CC(F)CC(O)C=C(C)C=CCNC(=O)C=CC1C)n2	531.274	2	0.0526316	5	0.131579	2.42202	1	121.97	23	0	3	0.210526	0.130435	0.304348	0.5	0.2	0.571429	0.131579	0.217391	0.605263	0.394737	0.173913	0.263158	0.0434783	0.157895	0.130435	0.0789474	0.0434783	0.0263158	0	0	0	0	0.131579	0	0.0869565	1	0	0.125	0	0	0	0.125	2
Flurithromycin ethyl succinate	31.1092	-115.679	-55.115	1	CCOC(=O)CCC(=O)O[C@H]1[C@H](O[C@@H]2[C@@H](C)[C@H](O[C@H]3C[C@@](C)(OC)[C@@H](O)[C@H](C)O3)[C@@H](C)C(=O)O[C@H](CC)[C@@](C)(O)[C@H](O)[C@@H](C)C(=O)[C@@](C)(F)C[C@@]2(C)O)O[C@H](C)C[C@@H]1N(C)C	879.499	4	0.0655738	14	0.229508	3.20209	14	227.48	14	2	1	0.57377	0.214286	0.857143	0.181818	0.166667	0.117647	0.295082	0.714286	0.229508	0.770492	0.0714286	0.295082	0.0714286	0.262295	0	0.0163934	0.0714286	0.0163934	0	0	0	0	0	0	0	0	0.0285714	0.285714	0	0	0	0.314286	0.5
Glecaprevir	57.41	0.700608	-36.3315	1	CC(C)(C)[C@@H]1NC(=O)O[C@@H]2CCC[C@H]2OC\C=C\C(F)(F)c2nc3ccccc3nc2O[C@@H]2C[C@H](N(C2)C1=O)C(=O)N[C@@]1(C[C@H]1C(F)F)C(=O)NS(=O)(=O)C1(C)CC1	838.298	3	0.0517241	10	0.172414	3.95498	6	192.42	18	2	2	0.62069	0.222222	0.222222	1	0.333333	0.7	0.137931	0.277778	0.310345	0.689655	0.277778	0.344828	0.166667	0.155172	0.111111	0.103448	0.111111	0.0689655	0	0	0	0.0172414	0.172414	0	0.166667	1	0.111111	0.111111	0.0555556	0	0.0277778	0.305556	0.75
Grazoprevir	26.2747	-11.5167	-19.0051	1	COc1ccc2nc3CCCCC[C@@H]4C[C@H]4OC(=O)N[C@H](C(=O)N4C[C@@H](C[C@H]4C(=O)N[C@@]4(C[C@H]4C=C)C(=O)NS(=O)(=O)C4CC4)Oc3nc2c1)C(C)(C)C	766.336	3	0.0555556	10	0.185185	3.35295	7	192.42	18	2	1	0.611111	0.166667	0.166667	0.833333	0.333333	0.7	0.148148	0.277778	0.333333	0.666667	0.222222	0.296296	0.111111	0.166667	0.111111	0.111111	0	0	0	0	0	0.0185185	0.185185	0	0.166667	1	0.121212	0.151515	0	0	0.030303	0.30303	1
Ivermectin	34.3809	-57.5761	-75.8242	1	CCC(C)[C@H]1O[C@]2(CC[C@@H]1C)C[C@@H]1CC(C\C=C(C)\[C@@H](O[C@H]3C[C@H](OC)[C@@H](O[C@H]4C[C@H](OC)[C@@H](O)[C@H](C)O4)[C@H](C)O3)[C@@H](C)\C=C\C=C3/CO[C@@H]4[C@H](O)C(C)=CC(C(=O)O1)[C@]34O)O2	874.508	3	0.0483871	13	0.209677	5.82575	8	170.06	16	3	0	0.677419	0.1875	0.25	0.0833333	0.333333	0.0666667	0.322581	0.375	0.258065	0.741935	0.0625	0.225806	0.0625	0.225806	0	0	0	0	0	0	0	0	0	0	0.1875	1	0	0.261905	0	0	0	0.261905	0.5
Ixabepilone	-83.9519	-83.0314	71.7998	Singleton	C[C@H]1CCC[C@@]2(C)O[C@H]2C[C@H](NC(=O)C[C@H](O)C(C)(C)C(=O)[C@H](C)[C@H]1O)C(\C)=C\c1csc(C)n1	506.281	3	0.0857143	6	0.171429	3.39357	2	112.05	16	1	0	0.257143	0.0625	0.625	2	0.166667	0.5	0.2	0.4375	0.457143	0.542857	0.0625	0.228571	0	0.142857	0.0625	0.0571429	0	0	0	0	0	0.0285714	0.142857	0	0.0625	0	0.111111	0	0	0	0.111111	0.222222	2
JNJ 26483327	-91.1993	19.5133	-82.8263	2	COc1cc2ncnc3Nc4cc(Br)ccc4CN(C)CCCCCOc1cc23	456.116	1	0.0344828	6	0.206897	4.70462	1	59.51	15	2	0	0.448276	0.133333	0.0666667	2.5	1	1.66667	0	0	0.517241	0.482759	0.2	0.241379	0.0666667	0.0689655	0.133333	0.137931	0	0	0	0	0	0	0.551724	0	0.2	1	0.153846	0.0769231	0	0	0	0.307692	1.5
Josamycin	18.3801	-83.9224	-60.0095	1	CO[C@H]1[C@@H](CC(=O)O[C@H](C)C\C=C\C=C\[C@H](O)[C@H](C)C[C@H](CC=O)[C@@H]1O[C@@H]1O[C@H](C)[C@@H](O[C@H]2C[C@@](C)(O)[C@@H](OC(=O)CC(C)C)[C@H](C)O2)[C@@H]([C@H]1O)N(C)C)OC(C)=O	827.467	3	0.0517241	13	0.224138	3.21638	14	207.25	16	1	3	0.655172	0.25	0.25	0.153846	0.333333	0.125	0.275862	0.4375	0.275862	0.724138	0.0625	0.275862	0.0625	0.258621	0	0.0172414	0	0	0	0	0	0	0	0	0	0	0.0263158	0.315789	0	0	0	0.342105	0.5
Linopristin	93.8355	12.3301	-1.67548	3	CC[C@H]1NC(=O)[C@@H](NC(=O)c2ncccc2O)[C@@H](C)OC(=O)[C@@H](NC(=O)[C@@H]2CC=C(CN3CCOCC3)CN2C(=O)[C@H](Cc2ccc(cc2)N(C)C)N(C)C(=O)[C@@H]2CCCN2C1=O)c1ccccc1	949.47	4	0.057971	12	0.173913	1.83301	9	223.36	19	4	2	0.608696	0.315789	0.421053	1.25	0.142857	0.909091	0.101449	0.368421	0.275362	0.724638	0.315789	0.275362	0.0526316	0.144928	0.263158	0.130435	0	0	0	0	0	0	0.26087	0	0.105263	0	0.0952381	0.0714286	0	0	0	0.166667	3
Lorlatinib	-7.1742	58.3692	-66.7235	2	C[C@H]1Oc2cc(cnc2N)-c2c(CN(C)C(=O)c3ccc(F)cc13)nn(C)c2C#N	406.155	1	0.0333333	6	0.2	1.62906	0	110.06	12	2	1	0.5	0.25	0.25	6	0.5	2.33333	0.0333333	0.0833333	0.4	0.6	0.166667	0.3	0.0833333	0.0666667	0.0833333	0.2	0	0.0333333	0	0	0	0	0.566667	0	0.25	1	0.333333	0	0.0666667	0	0	0.4	1
Mitemcinal	30.4707	-79.8942	-105.384	1	CC[C@H]1OC(=O)[C@H](C)[C@@H](O[C@H]2C[C@@](C)(OC)[C@@H](O)[C@H](C)O2)[C@H](C)[C@@H](O[C@@H]2O[C@H](C)C[C@@H]([C@H]2O)N(C)C(C)C)[C@@]2(C)CC(C)=C(O2)[C@H](C)C(=O)[C@]1(C)OC	755.482	2	0.0377358	12	0.226415	4.89875	9	152.88	13	2	3	0.622642	0.384615	0.538462	0.222222	0.333333	0.153846	0.301887	0.615385	0.245283	0.754717	0.153846	0.245283	0.153846	0.226415	0	0.0188679	0	0	0	0	0	0	0	0	0.0769231	1	0.030303	0.242424	0	0	0	0.272727	0.333333
Moxidectin	-3.91596	-31.7604	-56.0013	1	CO\N=C1/C[C@]2(C[C@@H]3C[C@@H](C\C=C(C)\C[C@@H](C)\C=C\C=C4/CO[C@@H]5[C@H](O)C(C)=C[C@@H](C(=O)O3)[C@]45O)O2)O[C@@H]([C@H]1C)C(\C)=C\C(C)C	639.377	2	0.0434783	8	0.173913	5.66964	3	116.04	16	2	0	0.565217	0.125	0.25	0.333333	0.33	0.222222	0.217391	0.3125	0.347826	0.652174	0.0625	0.195652	0.0625	0.173913	0	0.0217391	0	0	0	0	0	0	0	0	0.1875	0	0.0384615	0.192308	0	0	0	0.230769	0.5
Pacritinib	-54.3642	20.6963	-114.332	2	C(CN1CCCC1)Oc1ccc2Nc3nccc(n3)-c3cccc(COC\C=C\COCc1c2)c3	472.247	1	0.0285714	7	0.2	4.57554	4	69.94	18	1	2	0.485714	0.166667	0	1.5	1	1.25	0	0	0.514286	0.485714	0.222222	0.2	0.111111	0.0857143	0.111111	0.114286	0	0	0	0	0	0	0.514286	0	0.166667	3	0.117647	0.0588235	0	0	0	0.176471	1
Paritaprevir	14.7216	9.91709	-1.80772	1	Cc1cnc(cn1)C(=O)N[C@H]1CCCCC\C=C/[C@@H]2C[C@]2(NC(=O)[C@@H]2C[C@H](CN2C1=O)Oc1nc2ccccc2c2ccccc12)C(=O)NS(=O)(=O)C1CC1	765.294	3	0.0545455	10	0.181818	2.48935	6	186.85	15	3	0	0.672727	0.2	0.2	1	0.333333	1	0.0909091	0.266667	0.272727	0.727273	0.133333	0.272727	0	0.127273	0.133333	0.127273	0	0	0	0	0	0.0181818	0.363636	0	0.133333	0	0.135135	0.135135	0	0	0.027027	0.297297	3
Pimecrolimus	46.1727	-35.9569	-53.1591	1	CCC1C=C(C)CC(C)CC(OC)C2OC(O)(C(C)CC2OC)C(=O)C(=O)N2CCCCC2C(=O)OC(C(C)C(O)CC1=O)C(C)=CC1CCC(Cl)C(C1)OC	809.448	2	0.0357143	10	0.178571	6.80813	6	158.13	21	2	3	0.464286	0.238095	0.428571	0.25	0.142857	0.166667	0.25	0.428571	0.375	0.625	0.142857	0.232143	0.0952381	0.196429	0.047619	0.0178571	0	0	0	0.0178571	0	0	0	0	0.0952381	1	0	0.115385	0	0.0384615	0	0.153846	0.666667
Repotrectinib	-26.2601	45.9608	-37.4027	2	C[C@H]1CNC(=O)C2=C3N=C(N[C@H](C)C4=C(O1)C=CC(F)=C4)C=CN3N=C2	355.144	2	0.0769231	5	0.192308	2.16565	0	80.55	13	2	0	0.384615	0.153846	0.230769	3	0.5	2	0.0769231	0.153846	0.5	0.5	0.307692	0.307692	0.0769231	0.0769231	0.230769	0.192308	0	0.0384615	0	0	0	0	0.576923	0	0.153846	1	0.2	0	0.1	0	0	0.3	2
Rifabutin	44.6404	-42.1336	-60.1908	1	CO[C@H]1\C=C/O[C@@]2(C)Oc3c(C2=O)c2C4=NC5(CCN(CC(C)C)CC5)NC4=C(NC(=O)\C(C)=C/C=C\[C@H](C)[C@H](O)[C@@H](C)[C@@H](O)[C@@H](C)[C@H](OC(C)=O)[C@@H]1C)C(=O)c2c(O)c3C	846.442	5	0.0819672	13	0.213115	3.87699	5	209.58	24	2	2	0.442623	0.166667	0.416667	3.14286	0.166667	0.416667	0.147541	0.375	0.393443	0.606557	0.0833333	0.245902	0.0416667	0.180328	0.0416667	0.0655738	0	0	0	0	0	0	0.0983607	0	0.166667	2	0.111111	0.222222	0	0	0	0.333333	1
Rifampicin	46.3546	-46.5242	-55.6123	1	CO[C@H]1\C=C/O[C@@]2(C)Oc3c(C2=O)c2c(O)c(\C=N\N4CCN(C)CC4)c(NC(=O)\C(C)=C/C=C\[C@H](C)[C@H](O)[C@@H](C)[C@@H](O)[C@@H](C)[C@H](OC(C)=O)[C@@H]1C)c(O)c2c(O)c3C	822.405	6	0.101695	14	0.237288	2.94738	5	224.18	24	2	2	0.40678	0.166667	0.458333	3.14286	0.166667	0.384615	0.152542	0.375	0.40678	0.59322	0.0833333	0.271186	0.0416667	0.20339	0.0416667	0.0677966	0	0	0	0	0	0	0.169492	0	0.125	2	0.125	0.25	0	0	0	0.375	1
Rifapentine	49.2349	-46.8069	-58.969	1	CO[C@H]1\C=C/O[C@@]2(C)Oc3c(C2=O)c2c(O)c(\C=N\N4CCN(CC4)C4CCCC4)c(NC(=O)\C(C)=C/C=C\[C@H](C)[C@H](O)[C@@H](C)[C@@H](O)[C@@H](C)[C@H](OC(C)=O)[C@@H]1C)c(O)c2c(O)c3C	876.452	6	0.0952381	14	0.222222	3.6988	6	224.18	24	2	2	0.444444	0.166667	0.458333	3.14286	0.166667	0.384615	0.142857	0.375	0.380952	0.619048	0.0833333	0.253968	0.0416667	0.190476	0.0416667	0.0634921	0	0	0	0	0	0	0.15873	0	0.125	2	0.107143	0.214286	0	0	0	0.321429	1
Rokitamycin	20.2894	-81.0474	-46.0323	1	CCCC(=O)O[C@H]1[C@H](C)O[C@H](C[C@@]1(C)OC(=O)CC)O[C@@H]1[C@@H](C)O[C@@H](O[C@H]2[C@@H](CC=O)C[C@@H](C)[C@@H](O)\C=C\C=C\C[C@@H](C)OC(=O)C[C@@H](O)[C@@H]2OC)[C@H](O)[C@H]1N(C)C	827.467	3	0.0517241	13	0.224138	3.62989	15	207.25	16	1	2	0.637931	0.1875	0.3125	0.166667	0.25	0.125	0.275862	0.4375	0.275862	0.724138	0.0625	0.275862	0.0625	0.258621	0	0.0172414	0	0	0	0	0	0	0	0	0	0	0.027027	0.297297	0	0	0	0.324324	0.5
Roxithromycin	33.4858	-111.914	-67.9018	1	CC[C@H]1OC(=O)[C@H](C)[C@@H](O[C@H]2C[C@@](C)(OC)[C@@H](O)[C@H](C)O2)[C@H](C)[C@@H](O[C@@H]2O[C@H](C)C[C@@H]([C@H]2O)N(C)C)[C@](C)(O)C[C@@H](C)\C(=N/OCOCCOC)[C@H](C)[C@@H](O)[C@]1(C)O	836.525	5	0.0862069	16	0.275862	2.99998	13	218.09	14	3	1	0.586207	0.285714	0.714286	0.272727	0.2	0.1875	0.310345	0.714286	0.241379	0.758621	0.0714286	0.293103	0.0714286	0.258621	0	0.0344828	0	0	0	0	0	0	0	0	0	0	0.0588235	0.294118	0	0	0	0.352941	0.5
SB1317/TG02	-75.2072	50.0159	-100.352	2	CN1C\C=C\CCOc2cccc(c2)-c2ccnc(Nc3cccc(C1)c3)n2	372.195	1	0.0357143	5	0.178571	4.6296	0	51.48	18	0	3	0.321429	0.166667	0.0555556	2	1	2.5	0	0	0.642857	0.357143	0.222222	0.178571	0.0555556	0.0357143	0.166667	0.142857	0	0	0	0	0	0	0.642857	0	0.166667	3	0.111111	0	0	0	0	0.111111	2
SCY635	127.051	-58.3599	12.7901	3	CC[C@@H]1NC(=O)[C@H]([C@H](O)[C@H](C)C\C=C\C)N(C)C(=O)[C@H](C(C)C)N(C)C(=O)[C@H](CC(C)C)N(C)C(=O)[C@H](CC(C)C)N(C)C(=O)[C@@H](C)NC(=O)[C@H](C)NC(=O)[C@H](CC(C)C)N(C)C(=O)[C@@H](NC(=O)[C@H](CC(C)(C)O)N(C)C(=O)[C@@H](SCCN(C)C)N(C)C1=O)C(C)C	1320.88	6	0.0652174	14	0.152174	2.99529	19	303.47	33	3	6	0.423913	0.272727	0.606061	0.666667	0.0833333	0.928571	0.141304	0.333333	0.358696	0.641304	0.333333	0.282609	0	0.141304	0.333333	0.130435	0	0	0	0	0	0.0108696	0	0	0	0	0.025641	0.0512821	0	0	0.025641	0.102564	12
Simeprevir	-2.1656	-13.9722	-12.2917	1	COc1ccc2c(O[C@@H]3C[C@@H]4[C@@H](C3)C(=O)N(C)CCCC\C=C/[C@@H]3C[C@]3(NC4=O)C(=O)NS(=O)(=O)C3CC3)cc(nc2c1C)-c1nc(cs1)C(C)C	749.292	2	0.0384615	9	0.173077	4.55675	7	154.09	14	2	0	0.653846	0.142857	0.285714	0.666667	0.333333	0.75	0.0961538	0.285714	0.269231	0.730769	0.142857	0.269231	0	0.134615	0.142857	0.0961538	0	0	0	0	0	0.0384615	0.288462	0	0.142857	0	0.0882353	0.147059	0	0	0.0588235	0.294118	3
Sirolimus	44.7943	-55.3388	-54.744	1	CO[C@@H]1C[C@H](C[C@@H](C)[C@@H]2CC(=O)[C@H](C)\C=C(C)\[C@@H](O)[C@@H](OC)C(=O)[C@H](C)C[C@H](C)\C=C\C=C\C=C(C)\[C@H](C[C@@H]3CC[C@@H](C)[C@@](O)(O3)C(=O)C(=O)N3CCCC[C@H]3C(=O)O2)OC)CC[C@H]1O	913.555	3	0.0461538	12	0.184615	7.45084	6	195.43	29	1	4	0.369231	0.172414	0.413793	0.2	0.125	0.142857	0.230769	0.344828	0.446154	0.553846	0.103448	0.215385	0.0689655	0.2	0.0344828	0.0153846	0	0	0	0	0	0	0	0	0.0689655	1	0	0.166667	0	0	0	0.166667	0.666667
Solithromycin	19.9101	-66.1609	-79.0678	1	CC[C@H]1OC(=O)[C@@](C)(F)C(=O)[C@H](C)[C@@H](O[C@@H]2O[C@H](C)C[C@@H]([C@H]2O)N(C)C)[C@@](C)(C[C@@H](C)C(=O)[C@H](C)[C@H]2N(CCCCn3cc(nn3)-c3cccc(N)c3)C(=O)O[C@]12C)OC	844.475	2	0.0333333	12	0.2	5.76439	11	199.07	14	2	2	0.6	0.285714	0.714286	1	0.25	0.636364	0.216667	0.642857	0.233333	0.766667	0.0714286	0.283333	0.0714286	0.166667	0	0.1	0.0714286	0.0166667	0	0	0	0	0.183333	0	0.0714286	0	0.166667	0.166667	0	0	0	0.333333	0.5
Spiramycin	21.4627	-82.9068	-62.963	1	CO[C@H]1[C@H](O)CC(=O)O[C@H](C)C\C=C\C=C\[C@H](OC2CCC(C(C)O2)N(C)C)[C@H](C)C[C@H](CC=O)[C@@H]1OC1OC(C)C(OC2CC(C)(O)C(O)C(C)O2)C(C1O)N(C)C	842.514	4	0.0677966	15	0.254237	2.49611	11	197.78	16	2	2	0.661017	0.25	0.25	0.25	0.333333	0.2	0.322034	0.4375	0.271186	0.728814	0.0625	0.271186	0.0625	0.237288	0	0.0338983	0	0	0	0	0	0	0	0	0	0	0.0512821	0.282051	0	0	0	0.333333	0.5
Tacrolimus	50.1953	-40.344	-49.4872	1	CO[C@@H]1C[C@@H](CC[C@H]1O)\C=C(/C)[C@H]1OC(=O)[C@@H]2CCCCN2C(=O)C(=O)[C@]2(O)O[C@@H]([C@H](C[C@H]2C)OC)[C@H](C[C@@H](C)C\C(C)=C\[C@@H](CC=C)C(=O)C[C@H](O)[C@H]1C)OC	803.482	3	0.0526316	11	0.192982	5.59412	7	178.36	21	2	3	0.473684	0.238095	0.428571	0.2	0.142857	0.153846	0.245614	0.428571	0.368421	0.631579	0.142857	0.22807	0.0952381	0.210526	0.047619	0.0175439	0	0	0	0	0	0	0	0	0.0952381	1	0	0.148148	0	0	0	0.148148	0.666667
Telithromycin	13.5419	-62.1458	-79.007	1	CC[C@H]1OC(=O)[C@H](C)C(=O)[C@H](C)[C@@H](O[C@@H]2O[C@H](C)C[C@@H]([C@H]2O)N(C)C)[C@@](C)(C[C@@H](C)C(=O)[C@H](C)[C@H]2N(CCCCn3cnc(c3)-c3cccnc3)C(=O)O[C@]12C)OC	811.473	1	0.0172414	11	0.189655	5.14928	11	173.05	14	2	2	0.603448	0.285714	0.642857	0.857143	0.25	0.545455	0.224138	0.642857	0.241379	0.758621	0.0714286	0.258621	0.0714286	0.172414	0	0.0862069	0	0	0	0	0	0	0.189655	0	0.0714286	0	0.142857	0.171429	0	0	0	0.314286	0.5
Temsirolimus	57.6721	-68.3826	-54.3913	1	CO[C@@H]1C[C@H](C[C@@H](C)[C@@H]2CC(=O)[C@H](C)\C=C(C)\[C@@H](O)[C@@H](OC)C(=O)[C@H](C)C[C@H](C)\C=C\C=C\C=C(C)\[C@H](C[C@@H]3CC[C@@H](C)[C@@](O)(O3)C(=O)C(=O)N3CCCC[C@H]3C(=O)O2)OC)CC[C@H]1OC(=O)C(C)(CO)CO	1029.6	4	0.0547945	14	0.191781	7.12996	11	241.96	29	1	4	0.438356	0.172414	0.413793	0.125	0.125	0.117647	0.205479	0.344828	0.39726	0.60274	0.103448	0.232877	0.0689655	0.219178	0.0344828	0.0136986	0	0	0	0	0	0	0	0	0.0689655	1	0	0.21875	0	0	0	0.21875	0.666667
TMC647055	-36.0083	1.72366	58.4685	Singeton	COc1ccc2-c3c(C4CCCCC4)c4ccc5cc4n3CC(=Cc2c1)C(=O)N(C)CCOCCN(C)S(=O)(=O)NC5=O	606.251	1	0.0232558	7	0.162791	3.36392	2	107.38	17	1	0	0.465116	0.0588235	0.352941	0.5	0.2	0.714286	0	0	0.395349	0.604651	0.352941	0.255814	0.0588235	0.139535	0.235294	0.0930233	0	0	0	0	0.0588235	0.0232558	0.348837	0	0.176471	2	0	0.05	0	0	0	0.05	2.5
Vaniprevir	35.0909	-14.507	-22.7361	1	CC[C@@H]1C[C@]1(NC(=O)[C@@H]1C[C@@H]2CN1C(=O)[C@@H](NC(=O)OCC(C)(C)CCCCc1cccc3CN(Cc13)C(=O)O2)C(C)(C)C)C(=O)NS(=O)(=O)C1CC1	757.372	3	0.0566038	7	0.132075	4.14976	6	177.72	20	2	1	0.528302	0.15	0.25	2.2	0.25	0.6	0.132075	0.2	0.377358	0.622642	0.25	0.283019	0.1	0.169811	0.15	0.0943396	0	0	0	0	0	0.0188679	0.113208	0	0.15	2	0.0714286	0.142857	0	0	0.0357143	0.25	1.33333
Voxilaprevir	29.7322	-22.7784	-32.5765	1	CC[C@@H]1[C@@H]2CN([C@@H]1C(=O)N[C@@]1(C[C@H]1C(F)F)C(=O)NS(=O)(=O)C1(C)CC1)C(=O)[C@@H](NC(=O)O[C@@H]1C[C@H]1CCCCC(F)(F)c1nc3ccc(OC)cc3nc1O2)C(C)(C)C	868.345	3	0.05	10	0.166667	4.90459	8	192.42	18	2	1	0.616667	0.166667	0.277778	0.833333	0.333333	0.7	0.15	0.277778	0.3	0.7	0.222222	0.333333	0.111111	0.15	0.111111	0.1	0.111111	0.0666667	0	0	0	0.0166667	0.166667	0	0.166667	1	0.108108	0.135135	0.0540541	0	0.027027	0.324324	1
CC = Clinical Candidates; PC = Principal Component;
[truncated: 46 more columns]

## Sheet: Non-Oral Drugs Scores & SMILES
	scores				Molecular Descriptor Values
Non-Oral MC Drugs and CC	PC1 (x)	PC2 (y)	PC3 (z)	SMILES	001_MW	002_HBD	003_HBD/HA	004_HBA	005_HBA/HA	006_CLogP	007_Nrb	008_PSA	009_Largest Ring Size (N)	010_Large Subs	011_Small Subs	012_SubHA/HA	013_SubCount/N	014_PeriphCount/N	015_(SubN+1)/(SubO+1)	016_(PeriphN+1)/(PeriphO+1)	017_(TotalN+1)/(TotalO+1)	018_ChiralCenters/HA	019_RingChiralCenters/N	020_N/HA	021_(SubHA+PeriphHA)/HA	022_RingHet/N	023_TotalHet/HA	024_RingOxygen/N	025_TotalOxygen/HA	026_RingNitrogen/N	027_TotalNitrogen/HA	028_PeriphFluorine/N	029_TotalFluorine/HA	030_PeriphChlorine/N	031_TotalChlorine/HA	032_RingSulfur/N	033_TotalSulfur/HA	034_TotalAromatics/HA	035_Spiro Rings	036_FusedRings/N	037_Bridges	038_SubN/SubHA	039_SubO/SubHA	040_SubF/SubHA	041_SubCl/SubHA	042_SubS/SubHA	043_SubHeteroatoms/SubHA	044_(RingN+1)/(RingO+1)	045_PeriphN/PeriphHA
Anidulafungin	148.272	-22.0527	35.1684	CCCCCOc1ccc(cc1)-c1ccc(cc1)-c1ccc(cc1)C(=O)N[C@H]1C[C@@H](O)[C@@H](O)NC(=O)[C@@H]2[C@@H](O)[C@@H](C)CN2C(=O)[C@@H](NC(=O)[C@@H](NC(=O)[C@@H]2C[C@@H](O)CN2C(=O)[C@@H](NC1=O)[C@@H](C)O)[C@H](O)[C@@H](O)c1ccc(O)cc1)[C@@H](C)O	1139.51	14	0.170732	17	0.207317	-1.45722	14	377.42	21	3	3	0.646341	0.285714	0.380952	0.2	0.111111	0.444444	0.182927	0.380952	0.256098	0.743902	0.285714	0.292683	0	0.207317	0.285714	0.0853659	0	0	0	0	0	0	0.292683	0	0.0952381	0	0.0188679	0.169811	0	0	0	0.188679	7	0
Argipressin	133.232	-52.7577	74.2251	N[C@H]1CSSC[C@H](NC(=O)[C@H](CC(N)=O)NC(=O)[C@H](CCC(N)=O)NC(=O)[C@H](Cc2ccccc2)NC(=O)[C@H](Cc2ccc(O)cc2)NC1=O)C(=O)N1CCC[C@H]1C(=O)N[C@@H](CCCN=C(N)N)C(=O)NCC(N)=O	1083.44	14	0.186667	16	0.213333	-7.24932	19	467.16	20	4	1	0.653333	0.25	0.3	1.25	0.333333	1.23077	0.106667	0.3	0.266667	0.733333	0.35	0.386667	0	0.16	0.25	0.2	0	0	0	0	0.1	0.0266667	0.16	0	0	0	0.183673	0.142857	0	0	0	0.326531	6	0.166667
Atosiban	122.708	-39.3088	67.2381	CCOc1ccc(C[C@H]2NC(=O)CCSSC[C@H](NC(=O)[C@H](CC(N)=O)NC(=O)[C@@H](NC(=O)[C@@H](NC2=O)[C@@H](C)CC)[C@@H](C)O)C(=O)N2CCC[C@H]2C(=O)N[C@@H](CCCN)C(=O)NCC(N)=O)cc1	993.441	11	0.161765	13	0.191176	-4.60666	18	367.29	20	2	3	0.632353	0.25	0.25	0.875	0.166667	0.923077	0.132353	0.25	0.294118	0.705882	0.35	0.367647	0	0.176471	0.25	0.161765	0	0	0	0	0.1	0.0294118	0.0882353	0	0	0	0.139535	0.162791	0	0	0	0.302326	6	0
Bacitracin	175.409	-70.363	72.5568	CCC(C)C(N)C1=NC(CS1)C(=O)NC(CC(C)C)C(=O)NC(CCC(O)=O)C(=O)NC(C(C)CC)C(=O)NC1CCCCNC(=O)C(CC(N)=O)NC(=O)C(CC(O)=O)NC(=O)C(Cc2cnc[nH]2)NC(=O)C(Cc2ccccc2)NC(=O)C(NC(=O)C(CCCN)NC1=O)C(C)CC	1421.75	17	0.17	20	0.2	-7.19604	31	539.77	25	3	4	0.68	0.28	0.28	1.1	0.125	1.05882	0.15	0.28	0.25	0.75	0.28	0.34	0	0.16	0.28	0.17	0	0	0	0	0	0.01	0.11	0	0	0	0.147059	0.132353	0	0	0.0147059	0.294118	8	0
Bremelanotide	110.7	-12.6537	69.2397	CCCC[C@H](NC(C)=O)C(=O)N[C@H]1CC(=O)NCCCC[C@H](NC(=O)[C@H](Cc2c[nH]c3ccccc23)NC(=O)[C@H](CCCN=C(N)N)NC(=O)[C@@H](Cc2ccccc2)NC(=O)[C@H](Cc2cnc[nH]2)NC1=O)C(O)=O	1024.52	13	0.175676	14	0.189189	-3.27604	17	383.41	23	5	1	0.608108	0.26087	0.26087	1.8	0.142857	1.36364	0.0945946	0.26087	0.310811	0.689189	0.26087	0.324324	0	0.135135	0.26087	0.189189	0	0	0	0	0	0	0.27027	0	0	0	0.177778	0.0888889	0	0	0	0.266667	7	0
Bryostatin 1	51.2816	-44.8812	-53.5662	CCC\C=C\C=C\C(=O)O[C@H]1\C(C[C@H]2C[C@@H](OC(=O)C[C@H](O)C[C@@H]3C[C@H](OC(C)=O)C(C)(C)[C@](O)(C[C@@H]4C\C(C[C@@H](O4)\C=C/C(C)(C)[C@]1(O)O2)=C\C(=O)OC)O3)[C@@H](C)O)=C\C(=O)OC	904.446	4	0.0625	12	0.1875	5.03999	13	240.11	20	3	1	0.59375	0.2	0.3	0.1	0.2	0.0555556	0.171875	0.4	0.3125	0.6875	0.2	0.265625	0.2	0.265625	0	0	0	0	0	0	0	0	0	0	0.15	3	0	0.236842	0	0	0	0.236842	0.2	0
Capreomycin	110.498	-52.3542	77.2313	C[C@@H]1NC(=O)[C@@H](N)CNC(=O)[C@@H](NC(=O)\C(NC(=O)[C@H](CNC(=O)C[C@@H](N)CCCN)NC1=O)=C/NC(N)=O)[C@H]1CCN=C(N)N1	652.352	13	0.282609	13	0.282609	-9.89009	9	364.66	16	3	0	0.5	0.1875	0.4375	3	0.333333	1.875	0.130435	0.25	0.347826	0.652174	0.3125	0.456522	0	0.152174	0.3125	0.304348	0	0	0	0	0	0	0	0	0	0	0.347826	0.0869565	0	0	0	0.434783	6	0.142857
Carbetocin	117.07	-36.1056	67.5145	CC[C@H](C)[C@@H]1NC(=O)[C@H](Cc2ccc(OC)cc2)NC(=O)CCCSC[C@H](NC(=O)[C@H](CC(N)=O)NC(=O)[C@H](CCC(N)=O)NC1=O)C(=O)N1CCC[C@H]1C(=O)N[C@@H](CC(C)C)C(=O)NCC(N)=O	987.485	10	0.144928	12	0.173913	-3.58377	18	362.51	20	3	2	0.637681	0.25	0.25	0.875	0.166667	0.923077	0.115942	0.25	0.289855	0.710145	0.3	0.347826	0	0.173913	0.25	0.15942	0	0	0	0	0.05	0.0144928	0.0869565	0	0	0	0.136364	0.159091	0	0	0	0.295455	6	0
Caspofungin	168.72	-50.4967	40.3085	CCC(C)CC(C)CCCCCCCCC(=O)N[C@H]1C[C@@H](O)[C@@H](NCCN)NC(=O)[C@@H]2[C@@H](O)CCN2C(=O)[C@@H](NC(=O)[C@@H](NC(=O)[C@@H]2C[C@@H](O)CN2C(=O)[C@@H](NC1=O)[C@@H](C)O)[C@H](O)[C@@H](O)c1ccc(O)cc1)[C@H](O)CCN	1092.64	16	0.207792	18	0.233766	-4.82443	23	415.27	21	3	4	0.636364	0.333333	0.333333	0.555556	0.125	0.6875	0.207792	0.380952	0.272727	0.727273	0.285714	0.324675	0	0.194805	0.285714	0.12987	0	0	0	0	0	0	0.0779221	0	0.0952381	0	0.0816327	0.163265	0	0	0	0.244898	7	0
Colistimethate	223.54	-124.765	83.5057	CC[C@@H](C)CCCCC(=O)N[C@@H](CCNCS(O)(=O)=O)C(=O)N[C@@H]([C@@H](C)O)C(=O)N[C@@H](CCNCS(O)(=O)=O)C(=O)N[C@H]1CCNC(=O)[C@@H](NC(=O)[C@H](CCNCS(O)(=O)=O)NC(=O)[C@H](CCNCS(O)(=O)=O)NC(=O)[C@H](CC(C)C)NC(=O)[C@@H](CC(C)C)NC(=O)[C@H](CCNCS(O)(=O)=O)NC1=O)[C@@H](C)O	1638.63	23	0.214953	33	0.308411	-16.565	44	715.87	23	4	3	0.719626	0.304348	0.304348	0.454545	0.125	0.586207	0.121495	0.304348	0.214953	0.785047	0.304348	0.457944	0	0.261682	0.304348	0.149533	0	0	0	0	0	0.046729	0	0	0	0	0.116883	0.272727	0	0	0.0649351	0.454545	8	0
Colistin Sulfate	181.231	-72.4635	70.9066	CC[C@H](C)CCCC(=O)N[C@@H](CCN)C(=O)N[C@@H]([C@@H](C)O)C(=O)N[C@@H](CCN)C(=O)N[C@H]1CCNC(=O)[C@@H](NC(=O)[C@H](CCN)NC(=O)[C@H](CCN)NC(=O)[C@H](CC(C)C)NC(=O)[C@@H](CC(C)C)NC(=O)[C@H](CCN)NC1=O)[C@@H](C)O	1154.75	18	0.222222	18	0.222222	-8.09596	28	498.76	23	1	6	0.62963	0.304348	0.304348	1.42857	0.125	1.21429	0.160494	0.304348	0.283951	0.716049	0.304348	0.358025	0	0.160494	0.304348	0.197531	0	0	0	0	0	0	0	0	0	0	0.176471	0.117647	0	0	0	0.294118	8	0
Dactinomycin	111.618	-39.3545	-5.54372	CC(C)C1NC(=O)C(NC(=O)c2ccc(C)c3oc4c(C)c(=O)c(N)c(C(=O)NC5C(C)OC(=O)C(C(C)C)N(C)C(=O)CN(C)C(=O)C6CCCN6C(=O)C(NC5=O)C(C)C)c4nc23)C(C)OC(=O)C(C(C)C)N(C)C(=O)CN(C)C(=O)C2CCCN2C1=O	1254.63	5	0.0555556	16	0.177778	-0.0968825	8	355.54	16	1	3	0.733333	0.25	0.5	0.818182	0.166667	0.764706	0.111111	0.3125	0.177778	0.822222	0.3125	0.311111	0.0625	0.177778	0.25	0.133333	0	0	0	0	0	0	0.155556	0	0.0625	0	0.121212	0.151515	0	0	0	0.272727	2.5	0
Dalbavancin	186.246	-52.0691	-18.1079	CN[C@@H]1c2ccc(Oc3cc(O)c(Cl)c(c3)[C@@H]3NC(=O)[C@@H](Cc4ccc(Oc5cc6cc(Oc7ccc(cc7Cl)[C@@H](O)[C@@H]7NC(=O)[C@H](NC(=O)[C@@H]6NC3=O)c3ccc(O)c(c3)-c3c(O[C@H]6O[C@H](CO)[C@@H](O)[C@H](O)[C@@H]6O)cc(O)cc3[C@H](NC7=O)C(=O)NCCCN(C)C)c5O[C@@H]3O[C@@H]([C@@H](O)[C@H](O)[C@H]3NC(=O)CCCCCCCCC(C)C)C(O)=O)cc4)NC1=O)c(O)c2	1814.61	21	0.164062	27	0.210938	-0.393569	22	583.95	16	2	1	0.859375	0.1875	0.125	0.346154	0.333333	0.37931	0.140625	0.1875	0.125	0.875	0.1875	0.3125	0.0625	0.21875	0.125	0.078125	0	0	0	0.015625	0	0	0.328125	0	0.25	3	0.0727273	0.227273	0	0.0181818	0	0.318182	1.5	0
Dalfopristin	40.5704	-21.3078	-17.607	CCN(CC)CCS(=O)(=O)[C@@H]1CCN2[C@H]1C(=O)O[C@H](C(C)C)[C@H](C)\C=C\C(=O)NC\C=C\C(\C)=C\[C@@H](O)CC(=O)Cc1nc(co1)C2=O	690.33	2	0.0416667	9	0.1875	1.58189	7	176.42	23	1	2	0.375	0.130435	0.304348	0.5	0.166667	0.5	0.104167	0.173913	0.479167	0.520833	0.173913	0.291667	0.0434783	0.1875	0.130435	0.0833333	0	0	0	0	0	0.0208333	0.104167	0	0.0869565	1	0.0555556	0.166667	0	0	0.0555556	0.277778	2	0
Daptomycin	206.761	-111.927	69.2026	CCCCCCCCCC(=O)N[C@@H](Cc1c[nH]c2ccccc12)C(=O)N[C@H](CC(N)=O)C(=O)N[C@@H](CC(O)=O)C(=O)N[C@H]1C(C)OC(=O)[C@H](CC(=O)c2ccccc2N)NC(=O)[C@@H](NC(=O)[C@@H](CO)NC(=O)CNC(=O)[C@H](CC(O)=O)NC(=O)[C@@H](C)NC(=O)[C@H](CC(O)=O)NC(=O)[C@H](CCCN)NC(=O)CNC1=O)[C@H](C)CC(O)=O	1619.71	22	0.191304	27	0.234783	-9.3654	35	714.96	31	3	4	0.626087	0.225806	0.387097	0.5625	0.0909091	0.666667	0.113043	0.290323	0.269565	0.730435	0.322581	0.373913	0.0322581	0.226087	0.290323	0.147826	0	0	0	0	0	0	0.130435	0	0	0	0.111111	0.208333	0	0	0	0.319444	5	0
Desmopressin	131.918	-38.526	79.3034	NC(=O)CC[C@@H]1NC(=O)[C@H](Cc2ccccc2)NC(=O)[C@H](Cc2ccc(O)cc2)NC(=O)CCSSC[C@H](NC(=O)[C@H](CC(N)=O)NC1=O)C(=O)N1CCC[C@H]1C(=O)N[C@H](CCCNC(N)=N)C(=O)NCC(N)=O	1068.43	14	0.189189	15	0.202703	-6.12826	19	437.15	20	4	1	0.662162	0.25	0.25	1.25	0.166667	1.15385	0.0945946	0.25	0.27027	0.72973	0.35	0.378378	0	0.162162	0.25	0.189189	0	0	0	0	0.1	0.027027	0.162162	0	0	0	0.183673	0.142857	0	0	0	0.326531	6	0
Difimicin	34.8057	-77.0502	-76.4218	CC[C@H]1\C=C(C)\[C@@H](O)C\C=C\C=C(CO[C@@H]2O[C@H](C)[C@@H](OC(=O)c3c(O)c(Cl)c(O)c(Cl)c3CC)[C@H](O)[C@@H]2OC)\C(=O)O[C@@H](C\C=C(/C)\C=C(C)\[C@@H]1O[C@@H]1OC(C)(C)[C@@H](OC(=O)C(C)C)[C@H](O)[C@@H]1O)[C@@H](C)O	1056.43	7	0.0972222	15	0.208333	8.55618	15	269.49	18	2	2	0.680556	0.222222	0.277778	0.0625	0.333333	0.0526316	0.194444	0.222222	0.25	0.75	0.0555556	0.277778	0.0555556	0.25	0	0	0	0	0	0.0277778	0	0	0.0833333	0	0	0	0	0.306122	0	0.0408163	0	0.346939	0.5	0
Eptifibatide	111.012	-9.15063	69.7616	NC(=N)NCCCC[C@@H]1NC(=O)CCSSC[C@H](NC(=O)[C@@H]2CCCN2C(=O)[C@H](Cc2c[nH]c3ccccc23)NC(=O)[C@H](CC(O)=O)NC(=O)CNC1=O)C(N)=O	831.316	11	0.192982	12	0.210526	-5.06306	10	328.46	23	2	3	0.491228	0.217391	0.26087	1.5	0.142857	1.2	0.0877193	0.217391	0.403509	0.596491	0.347826	0.385965	0	0.157895	0.26087	0.192982	0	0	0	0	0.0869565	0.0350877	0.157895	0	0.0434783	0	0.178571	0.107143	0	0	0	0.285714	7	0
Eribulin	43.2312	-19.7632	-43.722	CO[C@H]1[C@@H](C[C@H](O)CN)O[C@H]2C[C@H]3O[C@H](C[C@@H](C)C3=C)CC[C@@H]3O[C@H](CC3=C)CC[C@@]34C[C@@H]5O[C@@H]6[C@@H](O[C@H]7CC[C@H](CC(=O)C[C@H]12)O[C@@H]7[C@@H]6O3)[C@H]5O4	729.409	2	0.0384615	12	0.230769	2.30778	4	148.01	22	3	1	0.557692	1.31818	0.0454545	0.285714	0.5	0.166667	0.365385	0.454545	0.423077	0.576923	0.181818	0.230769	0.181818	0.211538	0	0.0192308	0	0	0	0	0	0	0	0	0.318182	5	0.0344828	0.206897	0	0	0	0.241379	0.2	0
Lanreotide	114.989	-8.74401	59.3639	CC(C)[C@@H]1NC(=O)[C@H](CCCCN)NC(=O)[C@@H](Cc2c[nH]c3ccccc23)NC(=O)[C@H](Cc2ccc(O)cc2)NC(=O)[C@H](CSSC[C@H](NC1=O)C(=O)N[C@@H]([C@@H](C)O)C(N)=O)NC(=O)[C@H](N)Cc1ccc2ccccc2c1	1095.47	13	0.168831	12	0.155844	-0.332762	17	358.32	20	5	1	0.675325	0.3	0.25	1.16667	0.166667	1.09091	0.116883	0.3	0.25974	0.74026	0.35	0.298701	0	0.12987	0.25	0.142857	0	0	0	0	0.1	0.025974	0.324675	0	0	0	0.115385	0.0961538	0	0	0	0.211538	6	0
Latrunculin B	-88.5925	-88.5748	9.76942	C[C@H]1CC[C@@H]2C[C@H](C[C@@](O)(O2)[C@@H]2CSC(=O)N2)OC(=O)\C=C(C)/CC\C=C/1	395.177	2	0.0740741	4	0.148148	3.78687	1	84.86	14	1	0	0.37037	0.0714286	0.214286	0.5	0.5	0.333333	0.185185	0.214286	0.518519	0.481481	0.0714286	0.259259	0.0714286	0.185185	0	0.037037	0	0	0	0	0	0.037037	0	0	0.0714286	1	0.1	0.3	0	0	0.1	0.5	0.5	0
Linaclotide	193.829	-75.324	60.5443	C[C@@H](O)[C@@H]1NC(=O)[C@@H]2CSSC[C@@H]3NC(=O)[C@@H](N)CSSC[C@H](NC(=O)[C@H](CSSC[C@H](NC(=O)CNC1=O)C(=O)N[C@@H](Cc1ccc(O)cc1)C(O)=O)NC(=O)[C@H](Cc1ccc(O)cc1)NC(=O)[C@H](CCC(O)=O)NC3=O)C(=O)N[C@@H](CC(N)=O)C(=O)N1CCC[C@H]1C(=O)N[C@@H](C)C(=O)N2	1525.39	19	0.188119	22	0.217822	-10.7754	13	581.19	28	2	3	0.623762	0.172414	0.310345	0.571429	0.111111	0.727273	0.138614	0.25	0.277228	0.712871	0.357143	0.415842	0	0.207921	0.214286	0.148515	0	0	0	0	0.142857	0.0594059	0.118812	0	0.107143	2	0.111111	0.206349	0	0	0.0634921	0.380952	7	0
Lotilibcin	199.522	-89.209	74.0902	CC(C)CCC[C@@H]1CC(=O)N[C@@H](CO)C(=O)N[C@H]([C@@H](O)C(N)=O)C(=O)N[C@@H](CO)C(=O)NCC(=O)N(C)[C@H](Cc2ccccc2)C(=O)N[C@@H](CC(C)C)C(=O)N[C@H](CCCN)C(=O)N[C@@H](CCC(O)=O)C(=O)N[C@H](CC(N)=O)C(=O)N[C@H](Cc2c[nH]c3ccccc23)C(=O)N[C@H](CCCN)C(=O)N(C)[C@@H](C(C)C)C(=O)O1	1561.81	19	0.171171	22	0.198198	-8.45044	26	615.99	40	5	7	0.504505	0.3	0.375	0.75	0.0714286	0.818182	0.117117	0.3	0.36036	0.63964	0.325	0.342342	0.025	0.189189	0.3	0.153153	0	0	0	0	0	0	0.135135	0	0	0	0.0892857	0.125	0	0	0	0.214286	6.5	0
Micafungin	173.425	-52.1224	48.9633	CCCCCOc1ccc(cc1)-c1cc(no1)-c1ccc(cc1)C(=O)N[C@H]1C[C@@H](O)[C@@H](O)NC(=O)[C@@H]2[C@@H](O)[C@@H](C)CN2C(=O)[C@@H](NC(=O)[C@@H](NC(=O)[C@@H]2C[C@@H](O)CN2C(=O)[C@@H](NC1=O)[C@@H](C)O)[C@H](O)[C@@H](O)c1ccc(O)c(OS(O)(=O)=O)c1)[C@H](O)CC(N)=O	1269.44	16	0.179775	22	0.247191	-6.33845	18	512.97	21	4	2	0.674157	0.285714	0.380952	0.25	0.111111	0.416667	0.168539	0.380952	0.235955	0.764045	0.285714	0.370787	0	0.258427	0.285714	0.101124	0	0	0	0	0	0.011236	0.258427	0	0.0952381	0	0.05	0.25	0	0	0.0166667	0.316667	7	0
Murepavadin	223.566	-70.3134	82.8773	CC[C@H](C)[C@@H]1NC(=O)[C@H](Cc2c[nH]c3ccccc23)NC(=O)[C@@H](NC(=O)[C@@H]2CCCN2C(=O)[C@H]2CCCN2C(=O)[C@H](CO)NC(=O)[C@H](C)NC(=O)[C@H](CCN)NC(=O)[C@H](CCN)NC(=O)[C@H](Cc2c[nH]c3ccccc23)NC(=O)[C@H](CCN)NC(=O)[C@@H](CCN)NC(=O)[C@H](CCCN)NC(=O)[C@H](CCN)NC1=O)[C@@H](C)O	1552.86	22	0.198198	22	0.198198	-9.84657	21	627.7	42	2	11	0.486486	0.309524	0.357143	3	0.0666667	1.35294	0.144144	0.333333	0.378378	0.621622	0.333333	0.342342	0	0.144144	0.333333	0.198198	0	0	0	0	0	0	0.162162	0	0.047619	0	0.148148	0.037037	0	0	0	0.185185	15	0
Myolimus	36.3458	-53.9588	-58.9354	CO[C@@H]1C[C@H](C[C@@H](C)[C@@H]2CC[C@H](C)\C=C(C)\[C@@H](O)[C@@H](OC)C(=O)[C@H](C)C[C@H](C)\C=C\C=C\C=C(C)\[C@H](C[C@@H]3CC[C@@H](C)[C@@](O)(O3)C(=O)C(=O)N3CCCC[C@H]3C(=O)O2)OC)CC[C@H]1O	899.576	3	0.046875	11	0.171875	8.21818	6	178.36	29	1	4	0.375	0.172414	0.37931	0.2	0.142857	0.153846	0.234375	0.344828	0.453125	0.546875	0.103448	0.203125	0.0689655	0.1875	0.0344828	0.015625	0	0	0	0	0	0	0	0	0.0689655	1	0	0.166667	0	0	0	0.166667	0.666667	0
Natamycin	30.1449	-74.9416	-2.58467	C[C@H]1O[C@@H](O[C@@H]2C[C@@H]3O[C@@](O)(C[C@H](O)[C@H]3C(O)=O)C[C@@H](O)C[C@H]3O[C@@H]3\C=C\C(=O)O[C@H](C)C\C=C\C=C\C=C\C=C\2)[C@@H](O)[C@@H](N)[C@@H]1O	665.305	7	0.148936	13	0.276596	-1.69491	3	235.44	24	2	0	0.382979	0.0833333	0.208333	0.25	0.2	0.142857	0.297872	0.291667	0.510638	0.489362	0.0833333	0.297872	0.0833333	0.276596	0	0.0212766	0	0	0	0	0	0	0	0	0.0833333	1	0.0555556	0.388889	0	0	0	0.444444	0.333333	0
Nystatin	27.4939	-128.009	26.6594	C[C@H]1OC(OC2CC(O)C(C(O)CC(=O)CC(O)C(O)CCC(O)CC(O)CC(O)CC(=O)OC(C)C(C)C(O)C(C)\C=C\C=C\CC\C=C\C=C\C=C\C=C\2)C(O)=O)[C@@H](O)[C@@H](N)[C@@H]1O	925.503	12	0.184615	17	0.261538	-2.66615	3	331.9	38	1	1	0.215385	0.0526316	0.342105	0.285714	0.0909091	0.111111	0.276923	0.342105	0.584615	0.415385	0.0263158	0.276923	0.0263158	0.261538	0	0.0153846	0	0	0	0	0	0	0	0	0	0	0.0714286	0.428571	0	0	0	0.5	0.5	0
Octreotide	111.508	-10.7858	58.2818	C[C@@H](O)[C@@H](CO)NC(=O)[C@@H]1CSSC[C@H](NC(=O)[C@H](N)Cc2ccccc2)C(=O)N[C@@H](Cc2ccccc2)C(=O)N[C@H](Cc2c[nH]c3ccccc23)C(=O)N[C@@H](CCCCN)C(=O)N[C@@H]([C@@H](C)O)C(=O)N1	1018.44	13	0.183099	12	0.169014	-1.41126	17	335.46	20	5	1	0.647887	0.3	0.25	1	0.166667	1	0.140845	0.3	0.28169	0.71831	0.35	0.309859	0	0.140845	0.25	0.140845	0	0	0	0	0.1	0.028169	0.295775	0	0	0	0.108696	0.108696	0	0	0	0.217391	6	0
Oritavancin	189.935	-58.5458	-33.4223	CN[C@H](CC(C)C)C(O)=N[C@@H]1[C@H](O)c2ccc(Oc3cc4cc(Oc5ccc(cc5Cl)[C@@H](O[C@H]5C[C@@](C)(N)[C@@H](O)[C@H](C)O5)[C@@H]5N=C(O)[C@H](N=C(O)[C@@H]4N=C(O)[C@H](CC(O)=N)N=C1O)c1ccc(O)c(c1)-c1c(O)cc(O)cc1[C@@H](N=C5O)C(O)=O)c3O[C@@H]1O[C@H](CO)[C@@H](O)[C@H](O)[C@H]1O[C@H]1C[C@@](C)(NCc3ccc(cc3)-c3ccc(Cl)cc3)[C@@H](O)[C@H](C)O1)c(Cl)c2	1790.56	20	0.16	27	0.216	0.204949	19	574.59	16	3	1	0.848	0.25	0.1875	0.375	0.333333	0.407407	0.176	0.25	0.128	0.872	0.1875	0.312	0.0625	0.208	0.125	0.08	0	0	0.0625	0.024	0	0	0.336	0	0.25	3	0.0754717	0.216981	0	0.0188679	0	0.301887	1.5	0
OTX008	15.1322	-12.565	-149.641	CN(C)CCNC(=O)COc1c2Cc3cccc(Cc4cccc(Cc5cccc(Cc1ccc2)c5OCC(=O)NCCN(C)C)c4OCC(=O)NCCN(C)C)c3OCC(=O)NCCN(C)C	936.547	4	0.0588235	12	0.176471	3.38994	24	171.08	16	4	4	0.764706	0.5	0	1	1	1	0	0	0.235294	0.764706	0	0.235294	0	0.117647	0	0.117647	0	0	0	0	0	0	0.352941	0	0.25	4	0.153846	0.153846	0	0	0	0.307692	1	0
Oxytocin	124.718	-53.2764	65.376	CC[C@H](C)[C@@H]1NC(=O)[C@H](Cc2ccc(O)cc2)NC(=O)[C@@H](N)CSSC[C@H](NC(=O)[C@H](CC(N)=O)NC(=O)[C@H](CCC(N)=O)NC1=O)C(=O)N1CCC[C@H]1C(=O)N[C@@H](CC(C)C)C(=O)NCC(N)=O	1006.44	12	0.173913	13	0.188406	-4.99738	17	401.15	20	3	2	0.623188	0.25	0.3	0.875	0.333333	1	0.130435	0.3	0.289855	0.710145	0.35	0.376812	0	0.173913	0.25	0.173913	0	0	0	0	0.1	0.0289855	0.0869565	0	0	0	0.139535	0.162791	0	0	0	0.302326	6	0.166667
Pasireotide	120.647	31.2805	43.507	NCCCC[C@@H]1NC(=O)[C@@H](Cc2c[nH]c3ccccc23)NC(=O)[C@@H](NC(=O)[C@@H]2C[C@H](CN2C(=O)[C@H](Cc2ccccc2)NC(=O)[C@H](Cc2ccc(OCc3ccccc3)cc2)NC1=O)OC(=O)NCCN)c1ccccc1	1046.5	9	0.116883	10	0.12987	2.67013	18	284.44	18	6	0	0.688312	0.333333	0.333333	1.25	0.142857	1.1	0.0909091	0.333333	0.233766	0.766234	0.333333	0.246753	0	0.116883	0.333333	0.12987	0	0	0	0	0	0	0.428571	0	0.0555556	0	0.0754717	0.0566038	0	0	0	0.132075	7	0
Plecanatide	250.492	-108.11	41.663	CC(C)CC(NC(=O)C1CSSCC2NC(=O)C(CC(C)C)NC(=O)C(CCC(O)=O)NC(=O)C(CSSCC(NC(=O)C(C)NC(=O)C(NC(=O)C(CC(N)=O)NC(=O)C(NC2=O)C(C)C)C(C)C)C(=O)NC(C(C)O)C(=O)NCC(=O)N1)NC(=O)C(CCC(O)=O)NC(=O)C(CC(O)=O)NC(=O)C(N)CC(N)=O)C(O)=O	1680.63	23	0.20354	27	0.238938	-12.7912	28	729.45	29	2	4	0.663717	0.206897	0.310345	0.578947	0.111111	0.703704	0.141593	0.275862	0.256637	0.743363	0.344828	0.424779	0	0.230088	0.275862	0.159292	0	0	0	0	0.0689655	0.0353982	0	0	0.0344828	1	0.133333	0.24	0	0	0.0266667	0.4	9	0
Plerixafor	-169.501	-87.7722	67.5119	C(N1CCCNCCNCCCNCC1)c1ccc(CN2CCCNCCNCCCNCC2)cc1	502.447	6	0.166667	8	0.222222	-0.433592	4	96.98	14	1	0	0.611111	0.0714286	0	5	1	9	0	0	0.388889	0.611111	0.285714	0.222222	0	0	0.285714	0.222222	0	0	0	0	0	0	0.166667	0	0	0	0.181818	0	0	0	0	0.181818	5	0
Polymyxin B	177.935	-64.2396	71.2132	CCC(C)CCCCC(=O)N[C@@H](CCN)C(=O)N[C@@H]([C@@H](C)O)C(=O)N[C@@H](CCN)C(=O)N[C@H]1CCNC(=O)[C@@H](NC(=O)[C@H](CCN)NC(=O)[C@H](CCN)NC(=O)[C@H](CC(C)C)NC(=O)[C@@H](Cc2ccccc2)NC(=O)[C@@H](CCN)NC1=O)[C@@H](C)O	1202.75	18	0.211765	18	0.211765	-7.24917	29	498.76	23	2	5	0.647059	0.304348	0.304348	1.42857	0.125	1.21429	0.152941	0.304348	0.270588	0.729412	0.304348	0.341176	0	0.152941	0.304348	0.188235	0	0	0	0	0	0	0.0705882	0	0	0	0.163636	0.109091	0	0	0	0.272727	8	0
Quinupristin	99.3115	5.84531	-4.3172	CC[C@H]1NC(=O)[C@@H](NC(=O)c2ncccc2O)[C@@H](C)OC(=O)[C@@H](NC(=O)[C@@H]2CC(=O)[C@H](CS[C@@H]3CN4CCC3CC4)CN2C(=O)[C@H](Cc2ccc(cc2)N(C)C)N(C)C(=O)[C@@H]2CCCN2C1=O)c1ccccc1	1021.47	4	0.0547945	12	0.164384	2.17814	10	232.4	19	4	2	0.630137	0.315789	0.421053	1.25	0.142857	0.909091	0.136986	0.368421	0.260274	0.739726	0.315789	0.273973	0.0526316	0.136986	0.263158	0.123288	0	0	0	0	0	0.0136986	0.246575	0	0.105263	0	0.0869565	0.0652174	0	0	0.0217391	0.173913	3	0
Ramoplanin	294.922	-155.564	85.3124	CC(C)C\C=C\C=C/C(=O)N[C@@H](CC(N)=O)C(=O)N[C@H]1[C@H](OC(=O)[C@@H](NC(=O)[C@@H](C)NC(=O)[C@H](CC(C)C)NC(=O)CNC(=O)[C@@H](NC(=O)[C@H](NC(=O)[C@@H](NC(=O)[C@@H](CCCN)NC(=O)[C@H](Cc2ccccc2)NC(=O)[C@@H](NC(=O)[C@H](NC(=O)[C@@H](NC(=O)[C@H](NC(=O)[C@@H](CCCN)NC(=O)[C@H](NC1=O)c1ccc(O)cc1)[C@@H](C)O)c1ccc(O)cc1)c1ccc(O)cc1)[C@H](C)O)c1ccc(O[C@H]2O[C@H](CO)[C@@H](O)[C@H](O)[C@@H]2O[C@H]2O[C@H](CO)[C@@H]…	2552.04	36	0.198895	41	0.226519	-8.94988	35	1002.83	49	8	7	0.635359	0.306122	0.346939	0.291667	0.0588235	0.536585	0.165746	0.326531	0.270718	0.729282	0.326531	0.342541	0.0204082	0.220994	0.306122	0.116022	0	0	0	0.00552486	0	0	0.232044	0	0	0	0.0521739	0.2	0	0.00869565	0	0.26087	8	0
Rifamycin SV	32.2814	-51.5872	-50.314	CO[C@H]1C=CO[C@]2(C)Oc3c(C2=O)c2c(O)cc(N=C(O)\C(C)=C/C=C\[C@H](C)[C@H](O)[C@@H](C)[C@@H](O)[C@@H](C)[C@H](OC(C)=O)[C@@H]1C)c(O)c2c(O)c3C	697.31	6	0.12	11	0.22	4.17434	3	204.14	24	1	2	0.3	0.125	0.458333	0.142857	0.16667	0.153846	0.18	0.375	0.48	0.52	0.0833333	0.26	0.0416667	0.24	0.0416667	0.02	0	0	0	0	0	0	0.2	0	0.125	0	0	0.4	0	0	0	0.4	1	0
Rifaximin	26.6805	-34.9096	-54.6452	CO[C@H]1C=CO[C@@]2(C)Oc3c(C2=O)c2c4nc5cc(C)ccn5c4c(NC(=O)\C(C)=C/C=C\[C@H](C)[C@H](O)[C@@H](C)[C@@H](O)[C@@H](C)[C@H](OC(C)=O)[C@@H]1C)c(O)c2c(O)c3C	785.352	5	0.0877193	11	0.192982	4.58924	3	201.21	24	2	2	0.403509	0.166667	0.416667	0.428571	0.2	0.333333	0.157895	0.375	0.421053	0.578947	0.0833333	0.245614	0.0416667	0.192982	0.0416667	0.0526316	0	0	0	0	0	0	0.298246	0	0.166667	2	0.0869565	0.26087	0	0	0	0.347826	1	0
Somatoprim	112.595	3.7128	68.7723	C[C@@H](O)[C@@H]1NC(=O)[C@H](CCCCN)NC(=O)[C@@H](Cc2c[nH]c3ccccc23)NC(=O)[C@H](Cc2c[nH]c3ccccc23)NC(=O)[C@H](Cc2ccccc2)NC(=O)CCCNC(=O)CCCN(CC(N)=O)C(=O)[C@H](Cc2ccccc2)NC1=O	1122.57	12	0.146341	11	0.134146	0.417886	15	346.55	28	5	2	0.560976	0.25	0.285714	1.66667	0.111111	1.18182	0.0853659	0.214286	0.341463	0.658537	0.285714	0.268293	0	0.121951	0.285714	0.146341	0	0	0	0	0	0	0.365854	0	0	0	0.0869565	0.0434783	0	0	0	0.130435	9	0
Sugammadex	155.866	-215.675	-131.417	O[C@@H]1[C@@H](O)[C@@H]2O[C@H]3O[C@H](CSCCC(O)=O)[C@@H](O[C@H]4O[C@H](CSCCC(O)=O)[C@@H](O[C@H]5O[C@H](CSCCC(O)=O)[C@@H](O[C@H]6O[C@H](CSCCC(O)=O)[C@@H](O[C@H]7O[C@H](CSCCC(O)=O)[C@@H](O[C@H]8O[C@H](CSCCC(O)=O)[C@@H](O[C@H]9O[C@H](CSCCC(O)=O)[C@@H](O[C@H]1O[C@@H]2CSCCC(O)=O)[C@H](O)[C@H]9O)[C@H](O)[C@H]8O)[C@H](O)[C@H]7O)[C@H](O)[C@H]6O)[C@H](O)[C@H]5O)[C@H](O)[C@H]4O)[C@H](O)[C@H]3O	2000.41	24	0.1875	48	0.375	-5.41717	40	792.4	40	8	8	0.6875	0.4	0	0.030303	1	0.0204082	0.3125	0.6	0.3125	0.6875	0.4	0.4375	0.4	0.375	0	0	0	0	0	0	0	0.0625	0	0	0.2	8	0	0.363636	0	0	0.0909091	0.454545	0.0588235	0
Teicoplanin	212.556	-77.8231	-14.611	CCCCCCCCCC(=O)N[C@@H]1[C@@H](O)[C@H](O)[C@@H](CO)O[C@H]1Oc1c2Oc3ccc(C[C@H]4NC(=O)[C@H](N)c5ccc(O)c(Oc6cc(O)cc(c6)[C@H](NC4=O)C(=O)N[C@@H]4c(c2)cc1Oc1ccc(cc1Cl)[C@@H](O[C@@H]1O[C@H](CO)[C@@H](O)[C@H](O)[C@H]1NC(C)=O)[C@@H]1NC(=O)[C@H](NC4=O)c2ccc(O)c(c2)-c2c(O[C@H]4O[C@H](CO)[C@@H](O)[C@H](O)[C@@H]4O)cc(O)cc2[C@H](NC1=O)C(O)=O)c5)cc3Cl	1877.56	24	0.181818	31	0.234848	-2.41554	19	683.93	16	2	1	0.856061	0.1875	0.1875	0.258065	0.333333	0.294118	0.174242	0.1875	0.121212	0.878788	0.1875	0.333333	0.0625	0.25	0.125	0.0681818	0	0	0.0625	0.0151515	0	0	0.318182	0	0.25	3	0.0619469	0.265487	0	0.00884956	0	0.33628	1.5	0
Telavancin	208.453	-76.6947	-3.45154	CCCCCCCCCCNCCN[C@@]1(C)C[C@H](O[C@@H]2[C@@H](O)[C@H](O)[C@@H](CO)O[C@H]2Oc2c3Oc4ccc(cc4Cl)[C@@H](O)[C@@H](NC(=O)[C@@H](CC(C)C)NC)C(=O)N[C@@H](CC(N)=O)C(=O)N[C@@H]4c(c3)cc2Oc2ccc(cc2Cl)[C@@H](O)[C@@H]2NC(=O)[C@H](NC4=O)c3ccc(O)c(c3)-c3c(O)c(CNCP(O)(O)=O)c(O)cc3[C@H](NC2=O)C(O)=O)O[C@@H](C)[C@H]1O	1753.64	23	0.190083	29	0.239669	-6.16254	30	620.32	16	2	1	0.834711	0.1875	0.25	0.416667	0.25	0.428571	0.14876	0.25	0.132231	0.867769	0.1875	0.338843	0.0625	0.22314	0.125	0.0909091	0	0	0.0625	0.0165289	0	0	0.247934	0	0.25	3	0.0891089	0.227723	0	0.00990099	0	0.32673	1.5	0
Terlipressin	160.16	-57.2907	84.7068	NCCCC[C@H](NC(=O)[C@@H]1CCCN1C(=O)[C@@H]1CSSC[C@H](NC(=O)CNC(=O)CNC(=O)CN)C(=O)N[C@@H](Cc2ccc(O)cc2)C(=O)N[C@@H](Cc2ccccc2)C(=O)N[C@@H](CCC(N)=O)C(=O)N[C@@H](CC(N)=O)C(=O)N1)C(=O)NCC(N)=O	1226.5	16	0.188235	17	0.2	-10.0927	25	516.09	20	5	1	0.705882	0.3	0.25	1.09091	0.166667	1.0625	0.0941176	0.3	0.235294	0.764706	0.35	0.388235	0	0.176471	0.25	0.188235	0	0	0	0	0.1	0.0235294	0.141176	0	0	0	0.183333	0.166667	0	0	0	0.35	6	0
Thiostrepton	146.743	-78.7647	-2.07596	CC[C@H](C)[C@@H]1N[C@@H]2C=Cc3c(cc(nc3[C@H]2O)C(=O)O[C@H](C)[C@@H]2NC(=O)c3csc(n3)[C@@H](NC(=O)[C@H]3CSC(=N3)\C(NC(=O)[C@@H](NC(=O)c3csc(n3)[C@]3(CCC(=N[C@@H]3c3csc2n3)c2nc(cs2)C(=O)NC(=C)C(=O)NC(=C)C(N)=O)NC(=O)[C@H](C)NC(=O)C(=C)NC(=O)[C@H](C)NC1=O)[C@@H](C)O)=C\C)C(C)(O)[C@@H](C)O)[C@H](C)O	1663.49	17	0.149123	25	0.219298	-1.81146	12	567.32	27	3	2	0.675439	0.185185	0.37037	1	0.142857	1.05263	0.149123	0.333333	0.236842	0.763158	0.296296	0.368421	0.037037	0.157895	0.259259	0.166667	0	0	0	0	0	0.0438596	0.22807	0	0.185185	4	0.142857	0.142857	0	0	0.0649351	0.350649	4	0
Trabectedin	25.6845	29.5945	-20.4623	COc1cc2c(CCN[C@]22CS[C@H]3[C@H]4[C@@H]5N(C)[C@@H](Cc6cc(C)c(OC)c(O)c56)[C@H](O)N4[C@@H](COC2=O)c2c4OCOc4c(C)c(OC(C)=O)c32)cc1O	761.262	4	0.0740741	12	0.222222	4.19391	4	169.92	10	3	0	0.796296	0.3	0.1	0.3	0.5	0.333333	0.12963	0.4	0.185185	0.814815	0.3	0.277778	0.1	0.203704	0.1	0.0555556	0	0	0	0	0.1	0.0185185	0.333333	1	0.2	1	0.0465116	0.209302	0	0	0	0.255814	1	0
Tubocurarine	-14.3026	13.8418	-136.421	COc1cc2CC[N+](C)(C)[C@@H]3Cc4ccc(O)c(Oc5cc6[C@H](Cc7ccc(Oc(c1O)c23)cc7)N(C)CCc6cc5OC)c4	622.34	2	0.0434783	4	0.0869565	-1.54669	2	68.15	18	2	2	0.608696	0.222222	0	0.6	1	0.5	0.0434783	0.111111	0.391304	0.608696	0.0555556	0.152174	0.0555556	0.108696	0	0.0434783	0	0	0	0	0	0	0.521739	0	0.333333	3	0.0714286	0.142857	0	0	0	0.214286	0.5	0
Urofollitropin	121.226	-50.7235	59.0318	CC[C@H](C)[C@H]1NC(=O)[C@@H](Cc2ccc(O)cc2)NC(=O)[C@@H](N)CSSC[C@H](NC(=O)[C@H](CC(N)=O)NC(=O)[C@H](NC1=O)[C@@H](C)O)C(=O)N1CCC[C@@H]1C(=O)N[C@H](CC(C)C)C(=O)NCC(N)=O	979.426	12	0.179104	13	0.19403	-4.46793	15	378.29	20	2	3	0.61194	0.25	0.3	0.75	0.333333	0.923077	0.149254	0.3	0.298507	0.701493	0.35	0.373134	0	0.179104	0.25	0.164179	0	0	0	0	0.1	0.0298507	0.0895522	0	0	0	0.121951	0.170732	0	0	0	0.292683	6	0.166667
Vancomycin	190.677	-45.6098	-9.98915	CN[C@H](CC(C)C)C(=O)N[C@@H]1[C@H](O)c2ccc(Oc3cc4cc(Oc5ccc(cc5Cl)[C@@H](O)[C@@H]5NC(=O)[C@H](NC(=O)[C@@H]4NC(=O)[C@H](CC(N)=O)NC1=O)c1ccc(O)c(c1)-c1c(O)cc(O)cc1[C@H](NC5=O)C(O)=O)c3O[C@@H]1O[C@H](CO)[C@@H](O)[C@H](O)[C@H]1O[C@H]1C[C@](C)(N)[C@H](O)[C@H](C)O1)c(Cl)c2	1447.43	19	0.188119	24	0.237624	-4.39022	13	539.52	16	2	1	0.80198	0.1875	0.25	0.380952	0.25	0.4	0.178218	0.25	0.158416	0.841584	0.1875	0.346535	0.0625	0.237624	0.125	0.0891089	0	0	0.0625	0.019802	0	0	0.29703	0	0.25	3	0.0864198	0.246914	0	0.0123457	0	0.345679	1.5	0
Vapreotide	111.274	-0.240191	58.3781	CC(C)[C@H]1NC(=O)[C@@H](CCCCN)NC(=O)[C@H](Cc2c[nH]c3ccccc23)NC(=O)[C@@H](Cc2ccc(O)cc2)NC(=O)[C@@H](CSSC[C@H](NC1=O)C(=O)N[C@@H](Cc1c[nH]c2ccccc12)C(N)=O)NC(=O)[C@@H](N)Cc1ccccc1	1130.48	13	0.1625	11	0.1375	1.06667	18	353.88	20	5	1	0.6875	0.3	0.25	1.6	0.166667	1.3	0.1	0.3	0.25	0.75	0.35	0.2875	0	0.1125	0.25	0.15	0	0	0	0	0.1	0.025	0.375	0	0	0	0.127273	0.0727273	0	0	0	0.2	6	0
Ziconotide	331.551	-193.21	93.0826	CSCCC1NC(=O)C(CC(C)C)NC(=O)C(CCCNC(N)=N)NC(=O)C(CO)NC(=O)C2CSSCC3NC(=O)C(CO)NC(=O)CNC(=O)C(NC(=O)C(CSSCC(N)C(=O)NC(CCCCN)C(=O)NCC(=O)NC(CCCCN)C(=O)NCC(=O)NC(C)C(=O)NC(CCCCN)C(=O)N2)NC(=O)C(CSSCC(NC(=O)C(CCCCN)NC(=O)CNC(=O)C(CO)NC(=O)C(CCCNC(N)=N)NC3=O)C(N)=O)NC(=O)C(CC(O)=O)NC(=O)C(Cc2ccc(O)cc2)NC1=O)C(C)O	2639.14	42	0.237288	42	0.237288	-10.8487	40	1133.84	50	6	4	0.621469	0.2	0.34	1.16667	0.125	1.12121	0.124294	0.28	0.282486	0.717514	0.34	0.423729	0	0.180791	0.3	0.20339	0	0	0	0	0	0.039548	0.00564972	0	0.04	2	0.181818	0.154545	0	0	0.0454545	0.381818	16	0.0588235
CC = Clinical Candidates; PC = Principal Component;
[truncated: 45 more columns]

## Sheet: BU-CMD Compounds Scores & SMILE
	scores				Molecular Descriptor Values
BU-CMD Collection	PC1 (x)	PC2 (y)	PC3 (z)	SMILES	001_MW	002_HBD	003_HBD/HA	004_HBA	005_HBA/HA	006_CLogP	007_Nrb	008_PSA	009_Largest Ring Size (N)	010_Large Subs	011_Small Subs	012_SubHA/HA	013_SubCount/N	014_PeriphCount/N	015_(SubN+1)/(SubO+1)	016_(PeriphN+1)/(PeriphO+1)	017_(TotalN+1)/(TotalO+1)	018_ChiralCenters/HA	019_RingChiralCenters/N	020_N/HA	021_(SubHA+PeriphHA)/HA	022_RingHet/N	023_TotalHet/HA	024_RingOxygen/N	025_TotalOxygen/HA	026_RingNitrogen/N	027_TotalNitrogen/HA	028_PeriphFluorine/N	029_TotalFluorine/HA	030_PeriphChlorine/N	031_TotalChlorine/HA	032_RingSulfur/N	033_TotalSulfur/HA	034_TotalAromatics/HA	035_Spiro Rings	036_FusedRings/N	037_Bridges	038_SubN/SubHA	039_SubO/SubHA	040_SubF/SubHA	041_SubCl/SubHA	042_SubS/SubHA	043_SubHeteroatoms/SubHA	044_(RingN+1)/(RingO+1)	045_PeriphN/PeriphHA
149	-70.9826	27.9728	-118.008	C[C@@H]1\C=C\CC(=O)OCCCC(=O)N2CCCC2C(=O)N[C@@H]1c1ccc(Br)cc1	462.115	1	0.0344828	3	0.103448	2.75127	1	75.71	15	1	1	0.344828	0.133333	0.266667	1	0.25	0.6	0.103448	0.2	0.517241	0.482759	0.2	0.241379	0.0666667	0.137931	0.133333	0.0689655	0	0	0	0	0	0	0.206897	0	0.0666667	0	0	0	0	0	0	0.1	1.5	0
1	-36.2903	51.5395	88.5586	COC(=O)C1(C\C=C/C\C=C/c2ccccc2[C@@H]1C[N+]([O-])=O)C(=O)OC	359.137	0	0	4	0.153846	3.30058	6	95.74	10	0	4	0.615385	0.4	0	0.285714	1	0.285714	0.0384615	0.1	0.384615	0.615385	0	0.269231	0	0.230769	0	0.0384615	0	0	0	0	0	0	0.230769	0	0.1	0	0.0625	0.375	0	0	0	0.4375	1	0
133	-0.339606	-32.5904	10.6528	C[C@H]1\C=C\CC(=O)N[C@H]([C@@H](C)\C=C\CC(=O)N[C@H]1c1ccccc1)c1ccccc1	402.231	2	0.0666667	2	0.0666667	4.19364	2	58.2	14	2	0	0.4	0.142857	0.285714	1	0.333333	1	0.133333	0.285714	0.466667	0.533333	0.142857	0.133333	0	0.0666667	0.142857	0.0666667	0	0	0	0	0	0	0.4	0	0	0	0	0	0	0	0	0	3	0
290	-99.2404	-47.7703	61.0829	CC(C)(O)Cn1nc-2cc1COC[C@@H](NC(=O)CC1(CCCCC1)CNC(=O)c1cccc-2c1)c1ccccc1	544.305	3	0.075	5	0.125	3.95739	3	105.48	17	3	1	0.525	0.235294	0.117647	1.5	0.333333	1	0.025	0.0588235	0.425	0.575	0.176471	0.2	0.0588235	0.1	0.117647	0.1	0	0	0	0	0	0	0.425	1	0.117647	2	0.0952381	0.047619	0	0	0	0.142857	1.5	0
241	124.718	-53.2764	65.376	COc1cccc(CO\N=C2\Cc3c(Cl)c(O)cc(O)c3C(=O)O[C@H](C)C[C@@H]3O[C@@H]3/C=C\C=C\2)c1	499.14	2	0.0571429	7	0.2	5.63077	4	112.94	14	2	0	0.514286	0.142857	0.214286	0.4	0.333333	0.25	0.0857143	0.214286	0.4	0.6	0.0714286	0.257143	0.0714286	0.2	0	0.0285714	0	0	0	0.0285714	0	0	0.342857	0	0.142857	0	0.0555556	0.222222	0	0.0555556	0	0.333333	0.5	0
171	-111.382	-89.7491	-6.65139	C[C@H]1\C=C\CC(=O)OCCC(Oc2ccc(cc2)C(F)(F)F)C(=O)N[C@@H](Cc2c[nH]c3ccccc23)C(=O)N[C@H]1c1ccccc1	633.245	3	0.0652174	4	0.0869565	5.73308	6	109.52	15	3	0	0.586957	0.2	0.266667	1	0.25	0.666667	0.0869565	0.266667	0.326087	0.673913	0.2	0.23913	0.0666667	0.108696	0.133333	0.0652174	0	0.0652174	0	0	0	0	0.456522	0	0	0	0.037037	0.037037	0.111111	0	0	0.185185	1.5	0
228	-188.513	-90.359	30.4454	COc1ccc([C@@H]2CC(C)=C[C@H]3[C@H]2C(=O)c2cc([C@@H]4C=C(C)C[C@H]([C@@H]4C(=O)c4cc3c(OC)cc4O)c3ccc(OC)cc3OC)c(OC)cc2O)c(OC)c1	760.325	2	0.0357143	10	0.178571	8.53531	8	129.98	12	4	0	0.75	0.333333	0.166667	0.111111	0.333333	0.0909091	0.107143	0.333333	0.214286	0.785714	0	0.178571	0	0.178571	0	0	0	0	0	0	0	0	0.428571	0	0.333333	2	0	0.190476	0	0	0	0.190476	1	0
20	-173.398	-87.8236	16.5199	CO[C@@H]1COC(=O)C\C=C\[C@@H](C)[C@@H](COC(=O)[C@H](COCc2ccccc2)NC(=O)C\C=C\[C@H]1C)OC	517.268	1	0.027027	6	0.162162	2.89323	6	109.39	19	1	2	0.351351	0.157895	0.263158	0.25	0.25	0.222222	0.135135	0.263158	0.513514	0.486486	0.157895	0.243243	0.105263	0.216216	0.0526316	0.027027	0	0	0	0	0	0	0.162162	0	0	0	0	0.230769	0	0	0	0.230769	0.666667	0
131	18.1971	-82.8656	-61.4327	C[C@@H]1\C=C\CC(=O)OCCCC(=O)N[C@@H](Cc2c[nH]c3ccccc23)C(=O)N[C@@H]1c1ccccc1	473.231	3	0.0857143	3	0.0857143	3.46494	3	100.29	15	2	0	0.457143	0.133333	0.266667	2	0.25	0.8	0.0857143	0.2	0.428571	0.571429	0.2	0.2	0.0666667	0.114286	0.133333	0.0857143	0	0	0	0	0	0	0.428571	0	0	0	0.0625	0	0	0	0	0.0625	1.5	0
280	-178.481	-96.7508	37.5644	O=C1CC2(CCCCC2)CNC(=O)c2cccc(c2)-c2cc(COC[C@@H](N1)c1ccccc1)n[nH]2	472.247	3	0.0857143	4	0.114286	3.52228	1	96.11	17	2	2	0.457143	0.235294	0.117647	3	0.333333	1.25	0.0285714	0.0588235	0.485714	0.514286	0.176471	0.2	0.0588235	0.0857143	0.117647	0.114286	0	0	0	0	0	0	0.485714	1	0.117647	2	0.125	0	0	0	0	0.125	1.5	0
28	-112.145	-47.5029	-28.3208	CO[C@@H]1COC(=O)[C@H](C)NC(=O)C\C=C\[C@@H](C)[C@H](COC(=O)C\C=C\[C@@H]1C)NS(=O)(=O)c1ccc(C)cc1	550.235	2	0.0526316	6	0.157895	2.76437	3	137.1	19	1	1	0.342105	0.105263	0.315789	0.5	0.25	0.333333	0.131579	0.263158	0.5	0.5	0.157895	0.289474	0.105263	0.210526	0.0526316	0.0526316	0	0	0	0	0	0.0263158	0.157895	0	0	0	0.0769231	0.230769	0	0	0.0769231	0.384615	0.666667	0
183	23.8928	-110.399	-54.1349	C[C@@H]1\C=C\CC(=O)OC[C@H]2OC(C)(C)O[C@H]2C(=O)N2CCC[C@H]2C(=O)N[C@@H]1c1ccccc1	456.226	1	0.030303	5	0.151515	2.05079	1	94.17	15	2	1	0.424242	0.2	0.266667	0.333333	0.25	0.428571	0.151515	0.333333	0.454545	0.545455	0.2	0.242424	0.0666667	0.181818	0.133333	0.0606061	0	0	0	0	0	0	0.181818	0	0.133333	0	0	0.142857	0	0	0	0.142857	1.5	0
76	-175.851	-66.6677	-0.752814	C[C@H]1COC(=O)[C@H](C)NC(=O)[C@@H](C)COC(=O)[C@H](C)NC1=O	314.148	2	0.0909091	4	0.181818	-0.265285	0	110.8	14	0	0	0	0	0.571429	1	0.2	0.428571	0.181818	0.285714	0.636364	0.363636	0.285714	0.363636	0.142857	0.272727	0.142857	0.0909091	0	0	0	0	0	0	0	0	0	0	0	0	0	0	0	0	1	0
136	-113.74	-51.2394	-47.374	COc1cc2CS[C@H]3N(C)C(=O)[C@@H](SCc2cc1OC)N(C)C3=O	368.086	0	0	4	0.166667	1.47375	2	59.08	10	1	1	0.5	0.2	0.2	0.5	0.5	0.6	0.0833333	0.2	0.416667	0.583333	0.3	0.333333	0	0.166667	0.1	0.0833333	0	0	0	0	0.2	0.0833333	0.25	0	0.2	1	0.0833333	0.25	0	0	0	0.333333	2	0
47	-94.3934	-11.3503	-55.3317	CO[C@@H]1COC(=O)C\C=C\[C@@H](C)COC(=O)[C@H](CCSC)NC(=O)C\C=C\[C@H]1C	427.203	1	0.0344828	4	0.137931	2.21118	4	90.93	18	0	2	0.206897	0.111111	0.277778	0.5	0.25	0.285714	0.137931	0.222222	0.62069	0.37931	0.166667	0.275862	0.111111	0.206897	0.0555556	0.0344828	0	0	0	0	0	0.0344828	0	0	0	0	0	0.166667	0	0	0.166667	0.333333	0.666667	0
180	-210.58	-43.6903	32.838	C[C@@H]1\C=C\CC(=O)OC[C@H]2OC(C)(C)O[C@H]2C(=O)N[C@@H](Cc2c[nH]c3ccccc23)C(=O)N[C@@H]1c1ccccc1	545.253	3	0.075	5	0.125	3.53321	3	118.75	15	3	0	0.525	0.2	0.266667	0.666667	0.25	0.571429	0.125	0.333333	0.375	0.625	0.2	0.225	0.0666667	0.15	0.133333	0.075	0	0	0	0	0	0	0.375	0	0.0666667	0	0.047619	0.0952381	0	0	0	0.142857	1.5	0
18	-179.722	-52.6084	4.01359	CO[C@H]1C[C@@H]2C[C@H](C[C@H](CC(=O)O[C@H](C[C@@H]3CC[C@H](C)[C@@H](C1)O3)\C=C\CC(C)C)O2)OC(=O)\C=C/CCc1coc(\C=C/CNC(=O)OC)n1	700.393	1	0.02	7	0.14	5.1412	14	144.65	14	2	2	0.7	0.285714	0.0714286	0.428571	0.5	0.272727	0.16	0.428571	0.28	0.72	0.214286	0.24	0.214286	0.2	0	0.04	0	0	0	0	0	0	0.1	0	0.142857	2	0.0571429	0.171429	0	0	0	0.228571	0.25	0
257	-197.191	-82.2749	28.4317	C[C@@H]1\C=C\CC(=O)OCCCCC(=O)N[C@@H]1c1cccc(Br)c1	379.078	1	0.0434783	2	0.0869565	3.45969	1	55.4	13	1	0	0.304348	0.0769231	0.230769	1	0.333333	0.5	0.0869565	0.153846	0.565217	0.434783	0.153846	0.217391	0.0769231	0.130435	0.0769231	0.0434783	0	0	0	0	0	0	0.26087	0	0	0	0	0	0	0	0	0.142857	1	0
8	-199.085	-77.1186	28.5132	CO[C@@H]1COC(=O)C\C=C\[C@H](C)[C@H](COC(=O)CCC[C@H]1C)OC	342.204	0	0	4	0.166667	2.47098	2	71.06	16	0	2	0.166667	0.125	0.25	0.333333	0.333333	0.142857	0.166667	0.25	0.666667	0.333333	0.125	0.25	0.125	0.25	0	0	0	0	0	0	0	0	0	0	0	0	0	0.5	0	0	0	0.5	0.333333	0
26	-204.454	-73.6369	43.49	CO[C@@H]1COC(=O)C\C=C\[C@@H](C)[C@H]2O[C@H](COC(=O)C\C=C\[C@H]1C)[C@@H](O)C=C2	394.199	1	0.0357143	5	0.178571	1.89419	1	91.29	18	0	2	0.214286	0.111111	0.222222	0.333333	0.333333	0.125	0.214286	0.277778	0.642857	0.357143	0.166667	0.25	0.166667	0.25	0	0	0	0	0	0	0	0	0	0	0.0555556	1	0	0.333333	0	0	0	0.333333	0.25	0
307	-7.56661	20.6975	-84.1289	Cc1nnc(C)c2-c3cccc(n3)C(=O)N3C[C@H](O)C[C@H]3C(=O)N[C@@H](CO\C=C/c12)c1ccccc1	485.206	2	0.0555556	7	0.194444	0.774395	1	117.54	15	2	2	0.527778	0.266667	0.133333	1.5	0.333333	1.2	0.0833333	0.133333	0.416667	0.583333	0.266667	0.25	0.0666667	0.111111	0.2	0.138889	0	0	0	0	0	0	0.5	0	0.2	1	0.105263	0.0526316	0	0	0	0.157895	2	0
268	-117.315	-19.6605	58.5022	C[C@H]1\C=C\CC(=O)N[C@@H](CC(=O)N[C@@H](Cc2c[nH]c3ccccc23)C(=O)N[C@H]1c1cccn1S(=O)(=O)c1ccc(C)cc1)c1ccc(C)cc1	691.283	4	0.08	5	0.1	5.18746	5	142.16	14	3	0	0.64	0.214286	0.285714	1	0.25	1	0.08	0.285714	0.28	0.72	0.214286	0.22	0	0.1	0.214286	0.1	0	0	0	0	0	0.02	0.52	0	0	0	0.0625	0.0625	0	0	0.03125	0.15625	4	0
25	-196.998	-52.8884	0.400433	CO[C@H]1COC(=O)C\C=C\[C@H](C)[C@@H](COC(=O)[C@@H](C)NC(=O)C\C=C\[C@@H]1C)OC	411.226	1	0.0344828	5	0.172414	1.57254	2	100.16	19	0	2	0.137931	0.105263	0.315789	0.333333	0.25	0.25	0.172414	0.263158	0.655172	0.344828	0.157895	0.275862	0.105263	0.241379	0.0526316	0.0344828	0	0	0	0	0	0	0	0	0	0	0	0.5	0	0	0	0.5	0.666667	0
10	48.7033	68.5881	-11.6356	CO[C@@H]1COC(=O)[C@H](C)COC(=O)[C@@H]2CCCN2C(=O)C\C=C\[C@H]1C	353.184	0	0	4	0.16	1.19455	1	82.14	15	0	2	0.2	0.133333	0.333333	0.5	0.25	0.285714	0.16	0.266667	0.6	0.4	0.2	0.28	0.133333	0.24	0.0666667	0.04	0	0	0	0	0	0	0	0	0.0666667	0	0	0.2	0	0	0	0.2	0.666667	0
294	-123.505	-19.1239	-41.8959	CC1(C)CNC(=O)C(O)CNC(=O)c2cccc(c2)-c2[nH]ncc2C1	342.169	4	0.16	4	0.16	0.562975	0	107.11	14	0	2	0.24	0.142857	0.357143	3	0.25	1.25	0.04	0.0714286	0.56	0.44	0.142857	0.28	0	0.12	0.142857	0.16	0	0	0	0	0	0	0.44	0	0.142857	1	0.333333	0	0	0	0	0.333333	3	0
33	-201.796	-79.5416	50.4165	CO[C@@H]1COC(=O)[C@H](Cc2ccccc2)NC(=O)[C@@H](C)COC(=O)C\C=C\[C@@H]1C	403.199	1	0.0344828	4	0.137931	2.57822	3	90.93	15	1	1	0.310345	0.133333	0.333333	0.5	0.25	0.285714	0.137931	0.266667	0.517241	0.482759	0.2	0.241379	0.133333	0.206897	0.0666667	0.0344828	0	0	0	0	0	0	0.206897	0	0	0	0	0.111111	0	0	0	0.111111	0.666667	0
263	-208.206	-118.677	87.8744	CC(C)[C@H]1NC(=O)CCCCOC(=O)C\C=C\[C@H](C)[C@@H](NC1=O)c1ccccc1	400.236	2	0.0689655	3	0.103448	3.04192	2	84.5	16	1	1	0.310345	0.125	0.25	1	0.25	0.6	0.103448	0.1875	0.551724	0.448276	0.1875	0.206897	0.0625	0.137931	0.125	0.0689655	0	0	0	0	0	0	0.206897	0	0	0	0	0	0	0	0	0	1.5	0
15	-186.577	-98.8365	47.3567	C[C@@H]1\C=C\CC(=O)OC[C@@H](NS(=O)(=O)c2ccc(C)cc2)[C@H](C)\C=C\CC(=O)OC[C@H]1NS(=O)(=O)c1ccc(C)cc1	618.207	2	0.047619	6	0.142857	4.49271	4	144.94	16	2	0	0.52381	0.125	0.25	0.6	0.333333	0.333333	0.0952381	0.25	0.380952	0.619048	0.125	0.285714	0.125	0.190476	0	0.047619	0	0	0	0	0	0.047619	0.285714	0	0	0	0.0909091	0.181818	0	0	0.0909091	0.363636	0.333333	0
129	-178.524	-68.0353	1.67637	CC(C)[C@@H]1NC(=O)Cc2ccccc2COC(=O)C\C=C\[C@@H](C)[C@H](NC1=O)c1ccccc1	448.236	2	0.0606061	3	0.0909091	3.95591	2	84.5	16	1	2	0.393939	0.1875	0.25	1	0.25	0.6	0.0909091	0.1875	0.484848	0.515152	0.1875	0.181818	0.0625	0.121212	0.125	0.0606061	0	0	0	0	0	0	0.363636	0	0.0625	0	0	0	0	0	0	0	1.5	0
19	27.4939	-128.009	26.6594	CO[C@H]1C[C@@H]2C[C@H](O)C[C@H](CC(=O)O[C@H](C[C@@H]3CC[C@H](C)[C@@H](C1)O3)\C=C\CC(C)C)O2	438.298	1	0.0322581	5	0.16129	3.08589	4	74.22	14	1	3	0.516129	0.285714	0.0714286	0.333333	0.5	0.142857	0.258065	0.428571	0.451613	0.548387	0.214286	0.193548	0.214286	0.193548	0	0	0	0	0	0	0	0	0	0	0.142857	2	0	0.125	0	0	0	0.125	0.25	0
54	-184.98	-29.9099	7.15575	CO[C@@H]1COC(=O)[C@H](C)COC(=O)[C@H](C)NC(=O)C\C=C\[C@H]1C	327.168	1	0.0434783	4	0.173913	0.921889	1	90.93	15	0	1	0.0869565	0.0666667	0.4	0.5	0.25	0.285714	0.173913	0.266667	0.652174	0.347826	0.2	0.304348	0.133333	0.26087	0.0666667	0.0434783	0	0	0	0	0	0	0	0	0	0	0	0.5	0	0	0	0.5	0.666667	0
17	-159.615	-32.7008	141.519	C[C@@H]1NC(=O)C\C=C\[C@@H](C)[C@H]2O[C@H](COC(=O)[C@H](C)NC(=O)C\C=C\[C@@H](C)[C@H]3O[C@H](COC1=O)[C@@H](O)C=C3)[C@@H](O)C=C2	590.284	4	0.0952381	8	0.190476	0.60627	0	169.72	26	0	2	0.190476	0.0769231	0.307692	0.333333	0.2	0.272727	0.238095	0.307692	0.619048	0.380952	0.230769	0.285714	0.153846	0.238095	0.0769231	0.047619	0	0	0	0	0	0	0	0	0.0769231	2	0	0.25	0	0	0	0.25	0.6	0
77	-75.6583	50.2547	41.5049	CO[C@@H]1COC(=O)C\C=C\[C@H](C)[C@H](COC(=O)C\C=C\[C@H]1C)NS(=O)(=O)c1ccc(C)cc1	479.198	1	0.030303	5	0.151515	3.30089	3	108	16	1	1	0.393939	0.125	0.25	0.5	0.333333	0.25	0.121212	0.25	0.484848	0.515152	0.125	0.272727	0.125	0.212121	0	0.030303	0	0	0	0	0	0.030303	0.181818	0	0	0	0.0769231	0.230769	0	0	0.0769231	0.384615	0.333333	0
177	-172.172	-62.915	8.87218	C[C@@H]1\C=C\CC(=O)OCCCC(=O)N[C@@H](Cc2ccc(O)cc2)C(=O)N[C@@H]1c1cccc(Br)c1	528.126	3	0.0882353	4	0.117647	3.83137	3	104.73	15	2	0	0.441176	0.133333	0.266667	0.5	0.25	0.5	0.0882353	0.2	0.441176	0.558824	0.2	0.235294	0.0666667	0.147059	0.133333	0.0588235	0	0	0	0	0	0	0.352941	0	0	0	0	0.0666667	0	0	0	0.133333	1.5	0
221	-126.838	-6.73339	-76.0359	COc1cccc(OC2CCOC(=O)C\C=C\[C@H](C)[C@@H](NC(=O)[C@H](Cc3c[nH]c4ccccc34)NC2=O)c2ccccc2)c1OC	625.279	3	0.0652174	6	0.130435	4.53989	7	127.98	15	3	0	0.586957	0.2	0.266667	0.5	0.25	0.5	0.0869565	0.266667	0.326087	0.673913	0.2	0.217391	0.0666667	0.152174	0.133333	0.0652174	0	0	0	0	0	0	0.456522	0	0	0	0.037037	0.111111	0	0	0	0.148148	1.5	0
277	-72.0149	5.33368	-106.11	O=C1CC2(CCCCC2)CNC(=O)c2cccc(c2)-c2cc(COCCOCCN1)n[nH]2	440.242	3	0.09375	5	0.15625	1.69107	0	105.34	20	1	2	0.3125	0.15	0.1	3	0.333333	1	0	0	0.625	0.375	0.2	0.25	0.1	0.125	0.1	0.125	0	0	0	0	0	0	0.34375	1	0.1	2	0.2	0	0	0	0	0.2	1	0
273	-104.005	-41.4472	62.382	CC1(C)CNC(=O)CC2(CCCCC2)CNC(=O)c2cccc(c2)-c2cc(C1)n[nH]2	408.253	3	0.1	3	0.1	3.05366	0	86.88	16	1	2	0.333333	0.1875	0.25	3	0.333333	1.66667	0	0	0.533333	0.466667	0.125	0.2	0	0.0666667	0.125	0.133333	0	0	0	0	0	0	0.366667	1	0.125	2	0.2	0	0	0	0	0.2	3	0
23	-182.97	-49.9305	-0.0347106	C[C@H]1COC(=O)C\C=C\[C@H](C)[C@H](COC(=O)C\C=C\1)NS(=O)(=O)c1ccc(C)cc1	435.172	1	0.0333333	4	0.133333	3.2881	2	98.77	15	1	0	0.366667	0.0666667	0.266667	0.666667	0.333333	0.285714	0.1	0.2	0.5	0.5	0.133333	0.266667	0.133333	0.2	0	0.0333333	0	0	0	0	0	0.0333333	0.2	0	0	0	0.0909091	0.181818	0	0	0.0909091	0.363636	0.333333	0
240	-175.201	-76.6883	16.4206	C[C@@H]1C[C@@H]2O[C@@H]2\C=C/C=C/C(/Cc2c(Cl)c(O)cc(O)c2C(=O)O1)=N\OCc1ccc(Cl)c(Cl)c1	537.051	2	0.0571429	6	0.171429	6.99653	3	103.71	14	2	0	0.514286	0.142857	0.214286	0.5	0.333333	0.285714	0.0857143	0.214286	0.4	0.6	0.0714286	0.285714	0.0714286	0.171429	0	0.0285714	0	0	0	0.0857143	0	0	0.342857	0	0.142857	0	0.0555556	0.166667	0	0.166667	0	0.388889	0.5	0
140	-117.417	-70.9399	-12.1288	C[C@H]1CCCC(=O)N[C@H]([C@@H](C)CCCC(=O)N[C@H]1c1cccc(Br)c1)c1cccc(Br)c1	562.083	2	0.0625	2	0.0625	6.45499	2	58.2	14	2	0	0.4375	0.142857	0.285714	1	0.333333	1	0.125	0.285714	0.4375	0.5625	0.142857	0.1875	0	0.0625	0.142857	0.0625	0	0	0	0	0	0	0.375	0	0	0	0	0	0	0	0	0.142857	3	0
323	-125.826	-31.691	-39.2321	COc1ccc(CO\N=C2/CCCC\C=C\CCOC(=O)c3c(O)cc(O)cc3C2)cc1	439.199	2	0.0625	6	0.1875	5.82913	4	97.58	14	2	0	0.53125	0.142857	0.0714286	0.4	0.5	0.285714	0	0	0.4375	0.5625	0.0714286	0.21875	0.0714286	0.1875	0	0.03125	0	0	0	0	0	0	0.375	0	0.0714286	0	0.0588235	0.235294	0	0	0	0.294118	0.5	0
11	-161.251	-92.3745	-0.130886	CSCC[C@@H]1NC(=O)C\C=C\[C@@H](C)COC(=O)[C@@H](C)COC1=O	343.145	1	0.0434783	3	0.130435	1.56053	3	81.7	14	0	1	0.173913	0.0714286	0.357143	1	0.25	0.333333	0.130435	0.214286	0.608696	0.391304	0.214286	0.304348	0.142857	0.217391	0.0714286	0.0434783	0	0	0	0	0	0.0434783	0	0	0	0	0	0	0	0	0.25	0.25	0.666667	0
[truncated: 45 more columns]

## Sheet: Property Ranges Norm & Coeff
	Normalization Parameters			Coefficients from PCA Analysis
Descriptor	Max of Property Values (Pmax)	Min of Property Values (Pmin)	Standard Deviation of Property Values (σ)	PC1	PC2	PC3	PC4	PC5	PC6	PC7	PC8	PC9	PC10
001_MW	-	212.152	328.732	0.220848	-0.220661	-0.00898851	0.162121	0.0939101	0.112406	-0.0573136	-0.0887284	-0.0105454	0.00172286
002_HBD	42	-	-	0.102593	-0.104884	0.0515484	0.0938564	0.0427822	0.0390145	-0.0260289	0.034873	0.0556991	0.027357
003_HBD/HA	0.282609	-	-	0.126807	-0.11526	0.11358	0.0551246	0.0398922	-0.00522144	-0.0451306	0.0916727	0.111233	0.105949
004_HBA	48	-	-	0.104257	-0.124275	-0.0125582	0.0652912	0.0245204	0.0659939	0.00879626	0.0365468	0.0300531	-0.0335297
005_HBA/HA	0.571429	-	-	0.0382289	-0.0696935	-0.0202295	-6.86847e-05	-0.0401525	0.00932868	0.0536993	0.115347	0.0484355	-0.10379
006_CLogP	-	-16.565	3.50298	-0.173987	0.0846841	-0.195478	-0.117829	0.0178745	0.0789125	-0.238599	-0.312223	-0.110563	-0.000605158
007_Nrb	44	-	-	0.105494	-0.127541	0.0136628	0.0962742	0.0969454	0.0413125	0.0343031	-0.0564905	-0.0319968	0.00732244
008_PSA	-	0	144.216	0.279406	-0.295645	0.0859721	0.226412	0.0962055	0.0806256	-0.043386	0.0659064	0.0957559	-0.0434899
009_Largest Ring Size (N)	50	-	-	0.0945025	-0.116246	0.0115691	0.0317361	-0.0543263	-0.116426	-0.0758801	0.0547167	0.0962187	-0.0128282
010_Large Subs	8	-	-	0.0789268	-0.0229644	-0.00316214	0.0931837	0.103219	0.0219542	0.061892	-0.0735627	-0.0762098	-0.115018
011_Small Subs	11	-	-	0.0847279	-0.0383932	-0.0605713	0.0243633	-0.0520844	-0.131274	0.0358357	-0.010751	0.0749548	0.037929
012_SubHA/HA	0.859375	-	-	0.0533571	0.05099	-0.0667018	0.129023	0.197034	0.228118	0.128143	-0.123021	-0.147643	0.0347073
013_SubCount/N	1.31818	-	-	0.0360554	0.0218237	-0.0530152	0.0098582	0.0318606	-0.00322806	0.0786412	-0.0358294	-0.020656	-0.0244817
014_PeriphCount/N	0.857143	-	-	0.0951719	-0.142694	-0.00153513	-0.173828	0.034411	-0.140873	-0.155406	-0.231026	-0.0544918	-0.0684311
015_(SubN+1)/(SubO+1)	6	-	-	-0.0154446	0.0702024	0.0257381	0.0950447	-0.0441941	-0.104135	-0.0722015	0.00659358	0.0940077	0.248282
016_(PeriphN+1)/(PeriphO+1)	1	-	-	-0.240329	0.000656264	-0.182049	0.301565	0.0483517	0.070843	0.244687	0.180748	0.0292061	0.0869953
017_(TotalN+1)/(TotalO+1)	9	-	-	-0.0189502	0.037069	0.019369	0.0761689	0.0267387	-0.0569963	0.0215781	0.00232131	-0.000607713	0.167434
018_ChiralCenters/HA	0.365385	-	-	0.129155	-0.189825	-0.0991985	-0.273416	-0.0229833	0.040645	0.0445048	-0.0272503	-0.110166	-0.0166056
019_RingChiralCenters/N	0.785714	-	-	0.125772	-0.140107	-0.081707	-0.21985	0.0190066	-0.00478782	0.0342557	-0.117594	-0.145273	-0.0454686
020_N/HA	1	-	-	-0.0747253	-0.00563291	0.0519232	-0.0503665	-0.169022	-0.144821	-0.046321	0.167672	0.137252	-0.0141989
021_(SubHA+PeriphHA)/HA	0.878788	-	-	0.0746404	0.00571032	-0.0520033	0.0502513	0.169008	0.144733	0.0462427	-0.167832	-0.137346	0.0141753
022_RingHet/N	0.5	-	-	0.0767624	0.0701521	0.0844978	0.138019	-0.080595	-0.16125	0.223458	0.0969412	0.00465288	-0.282104
023_TotalHet/HA	0.714286	-	-	0.0533444	-0.064002	0.046318	0.0458538	-0.0538189	-0.026092	0.0582595	0.100743	0.021634	-0.114103
024_RingOxygen/N	0.4	-	-	-0.0259136	-0.0363673	-0.0773364	-0.0297072	-0.205716	0.0637925	0.114451	0.103971	0.100262	-0.340646
025_TotalOxygen/HA	0.375	-	-	0.0622563	-0.170897	-0.020596	-0.122776	-0.0899178	0.0805808	0.0226195	0.0972545	0.0489268	-0.305086
026_RingNitrogen/N	0.5	-	-	0.0880397	0.102653	0.13457	0.152491	0.076059	-0.217322	0.120561	0.0198637	-0.105193	0.0110062
027_TotalNitrogen/HA	0.571429	-	-	0.0250805	0.0540246	0.0497032	0.106279	0.00890961	-0.0993889	0.0343948	0.05132	0.00660597	0.0877768
028_PeriphFluorine/N	0.111111	-	-	0.00487078	-0.0129277	-0.0191261	-0.0209768	0.0121836	-0.00493639	-0.00814668	-0.0247983	-0.0191095	0.00336521
029_TotalFluorine/HA	0.222222	-	-	-0.008191	0.0167126	0.00739423	0.0118881	-0.00257534	0.00617759	0.0310774	-0.0188153	-0.0300714	-0.00690903
030_PeriphChlorine/N	0.0625	-	-	0.0336747	-0.0207834	-0.00523409	0.0518434	-0.0218323	0.148306	-0.0659627	0.0298634	-0.000396295	0.0420264
031_TotalChlorine/HA	0.115385	-	-	-0.00538004	-0.00393398	0.0062725	0.0168353	-0.0184289	0.0597434	-0.0587167	-0.00607485	-0.017839	-0.0395355
032_RingSulfur/N	0.2	-	-	0.0210567	-0.00499188	0.027305	0.0186887	0.0181672	0.0129194	0.0285947	-0.0169553	0.0703466	-0.0561291
033_TotalSulfur/HA	0.25	-	-	-0.0128389	-0.0276078	0.0128744	0.0265599	0.000816493	0.0141406	0.0329601	-0.00415305	0.00180518	0.0114518
034_TotalAromatics/HA	0.714286	-	-	-0.0609464	0.259109	-0.0376406	0.250988	0.0649759	0.0620986	-0.201325	-0.0293691	0.00227244	-0.172774
035_Spiro Rings	1	-	-	-0.0134161	0.108813	0.00265446	-0.0104464	0.0607114	0.135636	0.120739	-0.357931	0.81028	0.0637215
036_FusedRings/N	1	-	-	0.0253229	0.0522416	-0.0803205	0.022804	-0.0888066	0.0649248	-0.0113089	0.0416057	-0.0216753	0.0472472
037_Bridges	8	-	-	0.0669995	0.0256924	-0.0896338	0.0219459	-0.182735	0.121421	0.0235732	0.136962	-0.00956937	0.108944
038_SubN/SubHA	0.666667	-	-	0.0020324	0.0227676	0.00854091	0.10301	-0.0139927	-0.0457697	-0.0222535	0.059672	0.0761633	0.134703
039_SubO/SubHA	0.5	-	-	0.0306309	-0.191752	-0.0706989	-0.116021	0.0190872	0.148201	0.0246685	0.148822	0.00767959	-0.191628
040_SubF/SubHA	0.4	-	-	-0.0100251	0.0177713	0.0109828	0.0161058	-0.00772867	0.00512345	0.0329245	-0.013258	-0.0275544	-0.0141213
041_SubCl/SubHA	0.272727	-	-	-0.00905899	-0.00250431	0.00609061	0.00926929	-0.0119665	0.0330222	-0.0376923	-0.00493957	-0.0142243	-0.0398074
042_SubS/SubHA	0.625	-	-	-0.0185078	-0.0258791	0.0102879	0.0102402	-0.011445	0.00312608	0.0145108	-0.00467636	-0.00919384	0.0374151
043_SubHeteroatoms/SubHA	1	-	-	-0.00394017	-0.0909182	-0.0151821	0.0268729	-0.0139557	0.0543665	0.00309281	0.101349	0.0310954	0.00252679
044_(RingN+1)/(RingO+1)	16	-	-	0.0703694	-0.0145507	0.0984669	0.120749	0.0900406	-0.169361	0.0349121	-0.0329915	-0.0364877	0.0773338
045_PeriphN/PeriphHA	0.166667	-	-	0.0179262	-0.0200332	0.0269921	0.0222318	0.0237442	-0.036062	0.0125924	0.0176876	0.0205979	0.0202441
046_PeriphO/PeriphHA	1	-	-	0.238774	0.324933	0.37005	-0.244794	0.0110575	0.232468	0.0493675	0.0578874	0.00255555	-0.0358921
047_PeriphF/PeriphHA	0.5	-	-	0.00366479	-0.00474709	-0.0109223	-0.0100321	0.00229485	-0.00318593	-0.00549549	-0.00911817	-0.0118959	0.00639516
048_PeriphCl/PeriphH	0.333333	-	-	0.0297364	-0.0180473	-0.00522716	0.0462983	-0.0182009	0.132034	-0.0585998	0.0251576	-0.000818037	0.0353023
049_PeriphS/PeriphHA	0	-	-	0	0	0	0	0	0	0	0	0	0
050_PeriphHeteroatom/PeriphHA	1	-	-	0.246258	0.318805	0.368639	-0.241784	0.0118426	0.232226	0.0424294	0.0591573	0.00156038	-0.0244725
051_Polar Surface Area/HA	9.09143	-	-	0.081821	-0.0950619	0.0641367	0.0294555	-0.0145339	-0.0326753	-0.0065141	0.114857	0.0661147	-0.0841568
052_Carbonyls	26	-	-	0.104351	-0.0832553	0.0660511	0.0805263	0.0356143	-0.0446034	-0.0107266	-0.0319907	-0.00420631	0.014263
053_Carboxylates	8	-	-	0.0247521	-0.0417873	-0.00361466	0.0343794	-0.00179228	0.0419466	0.0266693	0.0634192	0.0321645	-0.0151354
054_Alcohols	16	-	-	0.0656212	-0.111466	-0.0349206	-0.0251617	0.025735	0.0999557	-0.00544953	0.051548	0.0462411	-0.0166689
055_Phenols	5	-	-	0.0557579	-0.0467774	-0.0120254	0.0638658	0.0135426	0.156998	-0.140879	0.0115302	0.00585023	-0.0416698
056_Primary Amines	6	-	-	0.0518121	-0.0549514	0.052258	0.0613347	0.0342267	-0.0515208	0.0107413	0.0192928	0.0544534	0.0367956
057_Secondary Amines	6	-	-	0.00875018	-0.0293225	0.0186387	0.0341825	0.00189287	0.0471358	0.0187684	0.0163015	0.00669136	0.074702
058_Tertiary Amines	4	-	-	0.00850194	0.0262091	-0.093714	-0.0259488	0.0283858	0.01247	0.131136	-0.0218541	-0.0866605	0.18914
059_Primary Amides	3	-	-	0.0611325	-0.0593037	0.0646191	0.0864526	0.0538302	-0.0131093	0.00353106	0.0161675	0.0294579	-0.0114978
060_Secondary Amides	22	-	-	0.0936239	-0.0505013	0.088732	0.111064	0.0348674	-0.0351545	-0.0252203	-0.00580605	0.0169544	0.0464643
061_Tertiary Amides	7	-	-	0.0340542	0.0534587	0.0018251	0.0185517	-0.00946392	-0.120003	0.128931	-0.0853448	-0.10578	0.0229145
062_Molecule Total Degree of Unsaturation	53	-	-	0.0924023	-0.00180981	-0.00172096	0.139499	0.0310614	0.0822368	-0.122468	-0.0521032	-0.0281644	-0.0436217
063_Peripheral carbonyls	16	-	-	0.110923	-0.066191	0.0909193	0.0298594	-0.00425003	-0.15852	-0.0544954	-0.0940079	-0.00605043	-0.00178077
064_Substituent Fsp3	1	-	-	0.144959	-0.168884	-0.129266	-0.287331	-0.0637235	-0.0649743	0.235654	-0.0464833	0.0508064	0.358978
065_Macrocycle Fsp3	1	-	-	-0.0994644	-0.0540012	0.0945366	-0.0553721	0.177381	0.0592899	0.362544	0.0327947	-0.0887423	0.00872754
066_Molecule Fsp3	1	-	-	0.0117602	-0.153915	-0.00692917	-0.175887	-0.0209429	-0.027711	0.241452	-0.00280686	0.00105365	0.218867
067_Max Substituent Size	91	-	-	0.0594095	-0.0649333	0.0055891	0.0827151	0.0701402	0.193943	-0.0454835	-0.0354141	-0.031456	0.0784722
068_Min Subsitutent Size	29	-	-	-0.111983	-0.0556289	0.124289	0.0735023	-0.00514052	0.133096	-0.026383	-0.0805061	-0.137432	0.0384535
069_Mean Substituent Size	37.6667	-	-	-0.00378701	-0.0580724	0.0324861	0.0862917	0.0712039	0.268813	-0.0594995	-0.0811843	-0.11278	0.0854281
070_Substituent Size st. dev	47.0567	-	-	0.0685844	-0.0381567	-0.0269308	0.0438469	0.0517663	0.150225	-0.0424899	-0.000190921	0.00845853	0.0558661
071_Substituent Size Distribution	1.76331	-	-	0.141718	-0.0217729	-0.0966364	0.00304616	0.0926621	0.0564284	-0.00620509	-0.0199844	0.0810066	0.0977057
072_Max Gap Size	34	-	-	-0.0588153	-0.0947814	0.0728289	-0.066154	0.042601	-0.0385682	-0.158081	0.12005	0.0677782	0.048872
073_Min Gap Size	18	-	-	-0.152346	-0.151331	0.21324	0.0356387	-0.217095	0.0480223	-0.0206755	-0.0827669	-0.0132712	0.0039282
074_Mean Gap Size	18	-	-	-0.142266	-0.156085	0.189484	-0.0395217	-0.0887631	0.00800462	-0.144439	0.0675625	0.0579517	0.0384148
075_Gap Size st dev	16	-	-	0.0162132	-0.00692791	-0.0389316	-0.0865014	0.158106	-0.0528798	-0.147158	0.182653	0.0720611	0.0473951
076_Max Gap Size/N	1	-	-	-0.213542	-0.114305	0.198982	-0.0958507	0.164814	0.0307528	-0.206069	0.160701	0.0129038	0.141389
077_Min Gap Size/N	1	-	-	-0.218693	-0.178242	0.29186	0.0574506	-0.248267	0.121911	-0.00449941	-0.144571	-0.0499115	0.0770589
078_Mean Gap Size/N	1	-	-	-0.221671	-0.137612	0.261216	-0.0133006	-0.0640594	0.0898669	-0.0903116	-0.00218358	-0.0177983	0.101235
079_St dev of Gap Size/N values	0.421053	-	-	1.26479e-05	0.0826539	-0.0969118	-0.170924	0.464384	-0.0901529	-0.234271	0.381969	0.0657833	0.076164
080_Bridging atoms	22	-	-	0.0517302	-0.0233107	-0.025018	0.0507596	-0.0686159	0.0728368	0.0140015	0.091507	0.0279221	0.0692702
081_Bridging atoms/N	0.448276	-	-	0.105508	0.0123047	-0.086798	0.0791376	-0.200483	0.20219	0.0157888	0.177114	0.000601511	0.170199
082_Restricted fraction	0.655172	-	-	0.177672	0.122426	-0.089316	0.0403713	-0.29366	0.0296395	-0.124015	0.107792	-0.0848688	0.179976
083_Non-restricted fraction	1	-	-	-0.177672	-0.122426	0.089316	-0.0403713	0.29366	-0.0296395	0.124015	-0.107792	0.0848688	-0.179976
084_MC amide bonds (total)	15	-	-	0.114438	-0.027945	0.111696	0.0896943	0.00313816	-0.164391	-0.00961337	-0.0702563	-0.0068845	0.0277634
085_Ring Complexity without heteroatoms	1	-	-	0.162312	-0.00930598	-0.112119	-0.0129079	-0.12807	-0.0826715	-0.241098	-0.146714	0.0631589	-0.0394323
086_Ring Complexity with heteroatoms	1	-	-	0.132625	0.00800852	-0.136285	-0.0229277	-0.1096	-0.0654775	-0.195774	-0.12913	0.0344117	-0.0502464
087_Substituent Flexibility Fraction	1	-	-	0.000264921	-0.115565	0.0745058	-0.0439089	0.00133471	-0.0859467	0.0182557	-0.0125497	-0.015759	-0.0154751
088_Substituent Rotation	9	-	-	0.0383181	0.0923221	-0.126931	0.0623361	-0.127647	0.0858586	0.0982169	0.0955531	0.0304399	0.023174
089_Peptide character index	1	-	-	0.19274	0.0684424	0.231236	0.0966544	-0.0151266	-0.249825	0.00046924	-0.117056	-0.106839	0.0609957
090_Charges	4	-	-	-0.0146298	-0.0105089	-0.0222141	0.0244977	-0.0160222	0.00373005	-0.00902225	0.0333429	0.0124221	-0.0601263
